# Supplementary material for: Design, Synthesis, and Evaluation of New 1H-Benzo[d]imidazole Based PqsR Inhibitors as Adjuvant Therapy for Pseudomonas aeruginosa Infections
Source: PubMed Central journal article supplement (PMC10823468; doi:10.1021/acs.jmedchem.3c00973), 2024-01-03
Supplement: jm3c00973_si_002.pdf [file jm3c00973_si_002.pdf]

## Supporting Information

# Design, Synthesis and Evaluation of New 1*H*-benzo[*d*]imidazole based PqsR Inhibitors as Adjuvant Therapy for *Pseudomonas aeruginosa* Infections

*Fadi Soukarieh*<sup>\*a,1,3</sup>, *Alaa Mashabi*<sup>a,2,†</sup>, *William Richardson*<sup>2</sup>, *Eduard Vico Oton*<sup>1‡</sup>, *Manuel Romero*<sup>1,3‡</sup>, *Jean-Frédéric Dubern*<sup>1</sup>, *Shaun N. Robertson*<sup>1,3</sup>, *Simone Lucanto*<sup>1,3</sup>, *Zoe Markham-Lee*<sup>2</sup>, *Tomás Sou*<sup>4‡</sup>, *Irena Kukavica-Ibrulj*<sup>5</sup>, *Roger C. Levesque*<sup>5</sup>, *Christel A.S. Bergstrom*<sup>4</sup>, *Nigel Halliday*<sup>1</sup>, *Barrie Kellam*<sup>2</sup>, *Jonas Emsley*<sup>2,3</sup>, *Stephan Heeb*<sup>1</sup>, *Paul Williams*<sup>1,3</sup>, *Michael J. Stocks*<sup>\*2,3</sup>, and *Miguel Cámara*<sup>\*1,3</sup>.

<sup>a</sup> These authors contributed equally to this study.

<sup>1</sup> School of Life Sciences, University of Nottingham Biodiscovery Institute, University of Nottingham, Nottingham, NG7 2RD, UK.

<sup>2</sup> School of Pharmacy, University of Nottingham Biodiscovery Institute, University of Nottingham, Nottingham, NG7 2RD, UK.

<sup>3</sup> The National Biofilms Innovation Centre, University of Nottingham Biodiscovery Institute, University of Nottingham, Nottingham, NG7 2RD, UK.

<sup>4</sup> Department of Pharmacy, Uppsala University, Uppsala, SE-751 23, Sweden

<sup>5</sup> Institut de Biologie Intégrative et des Systèmes, Université Laval, Quebec G1V 0A6, Canada.

## Corresponding Authors

Dr Fadi Soukarieh

[fadi.soukarieh@nottingham.ac.uk](mailto:fadi.soukarieh@nottingham.ac.uk)

Professor Michael Stocks

[michael.stocks@nottingham.ac.uk](mailto:michael.stocks@nottingham.ac.uk)

Professor Miguel Cámara,

[miguel.camara@nottingham.ac.uk](mailto:miguel.camara@nottingham.ac.uk)

## **Table of Contents**

|                       |            |
|-----------------------|------------|
| <b>Table S1</b>       | <b>S4</b>  |
| <b>Figures S1-S41</b> | <b>S5</b>  |
| <b>References</b>     | <b>S37</b> |

**Table S1.** Bacterial strains and plasmids used in this study

| Strain or plasmid                         | Relevant characteristics                                                                                                                           | Reference or origin                |
|-------------------------------------------|----------------------------------------------------------------------------------------------------------------------------------------------------|------------------------------------|
| PAO1-L                                    | Wound isolate, wild type PAO1, Lausanne subline.                                                                                                   | B. Holloway,<br><i>via</i> D. Haas |
| PAO1-L mCTX:: <i>P<sub>pqsA</sub>-lux</i> | PAO1-L with chromosomal mini-CTX:: <i>P<sub>pqsA</sub>-lux</i> insertion; Tc <sup>R</sup>                                                          | 1                                  |
| PAO1-N                                    | Wound isolate, wild type PAO1, Nottingham subline                                                                                                  | 2                                  |
| PA14                                      | Burn isolate, wild type UCBPP-PA14                                                                                                                 | 3, 4                               |
| PALESB58                                  | CF isolate                                                                                                                                         | 5                                  |
| IPCD1451                                  | CF isolate, >95% related to PAO1, IPCD ID 1451                                                                                                     | 6, 7                               |
| IPCD1350                                  | CF isolate, >95% related to PA14, IPCD ID 1350                                                                                                     | 6, 7                               |
| IPCD1331                                  | CF isolate, >95% related to PAK, IPCD ID 1331                                                                                                      | 6, 7                               |
| IPCD48                                    | CF isolate, >95% related to PA7, IPCD ID 48                                                                                                        | 6-8                                |
| PA14 mCTX:: <i>P<sub>pqsA</sub>-lux</i>   | PA14 with chromosomal mini-CTX:: <i>P<sub>pqsA</sub>-lux</i> insertion; Tc <sup>R</sup>                                                            | 1                                  |
| <u>Plasmids</u>                           |                                                                                                                                                    |                                    |
| mini-CTX:: <i>P<sub>pqsA</sub>-lux</i>    | R6K-based mini-CTX suicide plasmid for the chromosomal insertion of a <i>P<sub>pqsA</sub>-lux</i> transcriptional reporter fusion; Tc <sup>R</sup> | 9                                  |
| pMMG                                      | pME6032Δ <i>lacI</i> constitutively expressing GFP from the <i>P<sub>tac</sub></i> promoter                                                        | 10                                 |

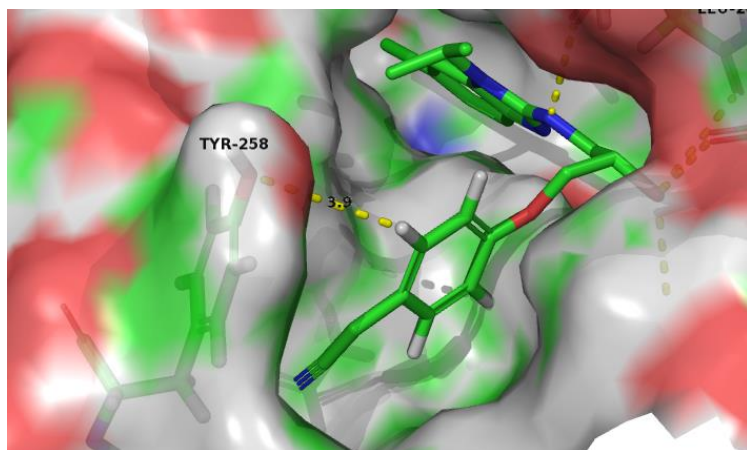

Figure S1: Schematic representation of the measurement between the *ortho*- position of the phenoxy ring of **6f** and the oxygen atom of the Tyrosine 258 (PqsR ligand binding domain).

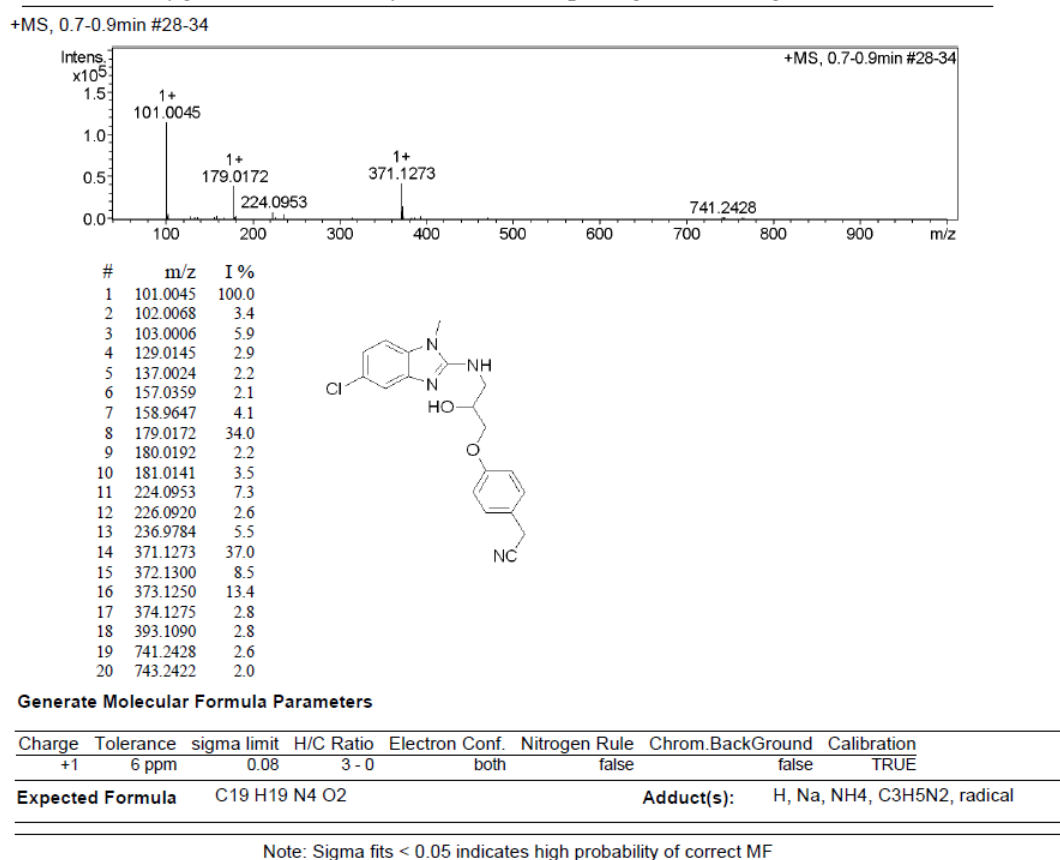

Figure S2. HRMS spectrum of **6b**.

+MS, 0.7-0.9min #28-34

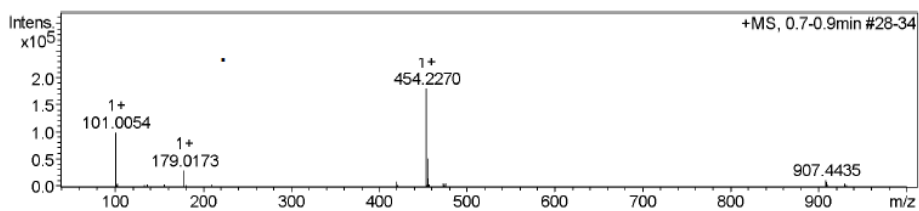

| #  | m/z      | I %   |
|----|----------|-------|
| 1  | 101.0054 | 55.1  |
| 2  | 102.0076 | 1.8   |
| 3  | 103.0014 | 3.2   |
| 4  | 137.0025 | 2.0   |
| 5  | 157.0361 | 2.0   |
| 6  | 179.0173 | 16.6  |
| 7  | 181.0129 | 1.8   |
| 8  | 210.6240 | 2.1   |
| 9  | 420.2391 | 4.9   |
| 10 | 454.2270 | 100.0 |
| 11 | 455.2300 | 28.7  |
| 12 | 456.2274 | 9.2   |
| 13 | 457.2282 | 2.0   |
| 14 | 473.2203 | 3.9   |
| 15 | 476.2095 | 3.6   |
| 16 | 907.4435 | 7.1   |
| 17 | 908.4488 | 4.2   |
| 18 | 909.4483 | 2.0   |
| 19 | 929.4252 | 2.7   |
| 20 | 930.4261 | 1.6   |

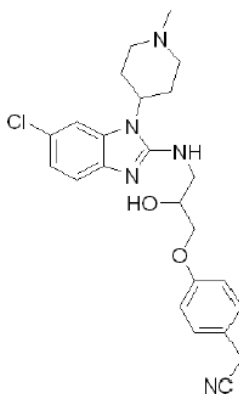

Generate Molecular Formula Parameters

| Charge                  | Tolerance                | sigma limit | H/C Ratio | Electron Conf.    | Nitrogen Rule | Chrom.BackGround                   | Calibration |
|-------------------------|--------------------------|-------------|-----------|-------------------|---------------|------------------------------------|-------------|
| +1                      | 6 ppm                    | 0.08        | 3 - 0     | both              | false         | false                              | TRUE        |
| <b>Expected Formula</b> | <b>C24 H28 Cl1 N5 O2</b> |             |           | <b>Adduct(s):</b> |               | <b>H, Na, NH4, C3H5N2, radical</b> |             |

Note: Sigma fits < 0.05 indicates high probability of correct MF

Figure S3. HRMS spectrum of **6r**.

+MS, 0.7-0.9min #28-34

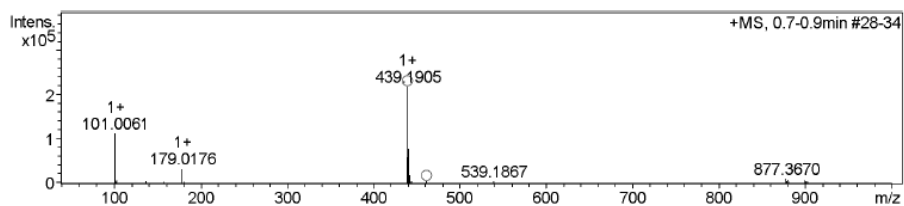

| #  | m/z      | I %   |
|----|----------|-------|
| 1  | 101.0061 | 51.9  |
| 2  | 102.0088 | 1.8   |
| 3  | 103.0023 | 3.0   |
| 4  | 137.0034 | 2.4   |
| 5  | 179.0176 | 14.8  |
| 6  | 181.0136 | 1.5   |
| 7  | 439.1905 | 100.0 |
| 8  | 440.1926 | 27.4  |
| 9  | 441.1879 | 35.4  |
| 10 | 442.1904 | 9.0   |
| 11 | 444.1688 | 2.2   |
| 12 | 461.1712 | 2.5   |
| 13 | 539.1867 | 2.1   |
| 14 | 877.3670 | 4.3   |
| 15 | 878.3705 | 2.5   |
| 16 | 879.3682 | 3.4   |
| 17 | 880.3683 | 1.7   |
| 18 | 899.3485 | 3.1   |
| 19 | 900.3522 | 1.8   |
| 20 | 901.3516 | 2.4   |

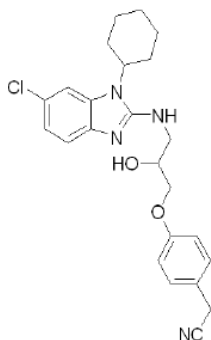

#### Generate Molecular Formula Parameters

| Charge | Tolerance | sigma limit | H/C Ratio | Electron Conf. | Nitrogen Rule | Chrom.BackGround | Calibration |
|--------|-----------|-------------|-----------|----------------|---------------|------------------|-------------|
| +1     | 6 ppm     | 0.08        | 3 - 0     | both           | false         | false            | TRUE        |

Expected Formula C<sub>24</sub> H<sub>27</sub> Cl<sub>1</sub> N<sub>4</sub> O<sub>2</sub> Adduct(s): H, Na, NH<sub>4</sub>, C<sub>3</sub>H<sub>5</sub>N<sub>2</sub>, radical

| # | meas. m/z | theo. m/z | Err [ppm] | Sigma  | Formula                                                           | Adduct | Adduct Mass |
|---|-----------|-----------|-----------|--------|-------------------------------------------------------------------|--------|-------------|
| 1 | 439.1905  | 439.1895  | 2.10      | 0.0043 | C <sub>24</sub> H <sub>28</sub> ClN <sub>4</sub> O <sub>2</sub>   | M+H    | 1.0078      |
| 1 | 461.1712  | 461.1715  | 0.60      | 0.0121 | C <sub>24</sub> H <sub>27</sub> ClN <sub>4</sub> NaO <sub>2</sub> | M+Na   | 22.9898     |

Note: Sigma fits < 0.05 indicates high probability of correct MF

Figure S4. HRMS spectrum of **6l**.

+MS, 0.7-0.9min #28-34

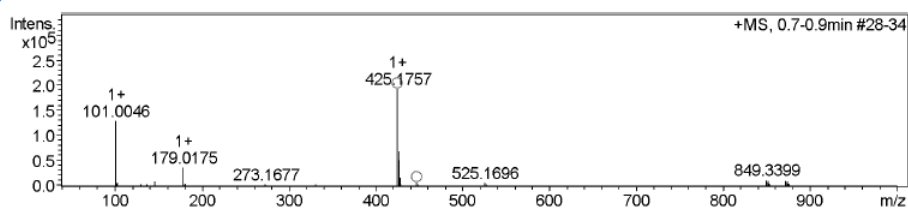

| #  | m/z      | I %   |
|----|----------|-------|
| 1  | 101.0046 | 66.4  |
| 2  | 102.0065 | 2.3   |
| 3  | 103.0007 | 3.7   |
| 4  | 146.1549 | 4.4   |
| 5  | 179.0175 | 18.7  |
| 6  | 181.0139 | 2.0   |
| 7  | 425.1757 | 100.0 |
| 8  | 426.1781 | 26.6  |
| 9  | 427.1732 | 35.9  |
| 10 | 428.1752 | 9.1   |
| 11 | 447.1562 | 3.5   |
| 12 | 525.1696 | 2.7   |
| 13 | 849.3399 | 6.3   |
| 14 | 850.3423 | 3.6   |
| 15 | 851.3395 | 5.1   |
| 16 | 852.3412 | 2.4   |
| 17 | 871.3205 | 5.3   |
| 18 | 872.3266 | 2.7   |
| 19 | 873.3179 | 4.2   |
| 20 | 874.3188 | 2.0   |

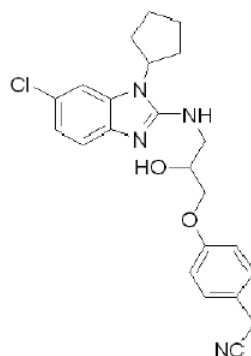

Generate Molecular Formula Parameters

| Charge                  | Tolerance         | sigma limit | H/C Ratio | Electron Conf. | Nitrogen Rule  | Chrom.BackGround  | Calibration                 |
|-------------------------|-------------------|-------------|-----------|----------------|----------------|-------------------|-----------------------------|
| +1                      | 6 ppm             | 0.08        | 3 - 0     | both           | false          | false             | TRUE                        |
| <b>Expected Formula</b> | C23 H25 Cl1 N4 O2 |             |           |                |                | <b>Adduct(s):</b> | H, Na, NH4, C3H5N2, radical |
| #                       | meas. m/z         | theo. m/z   | Err [ppm] | Sigma          | Formula        | Adduct            | Adduct Mass                 |
| 1                       | 425.1757          | 425.1739    | 4.40      | 0.0011         | C23H26ClN4O2   | M+H               | 1.0078                      |
| 1                       | 447.1562          | 447.1558    | 0.90      | 0.0200         | C23H25ClN4NaO2 | M+Na              | 22.9898                     |

Note: Sigma fits < 0.05 indicates high probability of correct MF

Figure S5. HRMS spectrum of 6k.



+MS, 0.7-0.9min #28-34

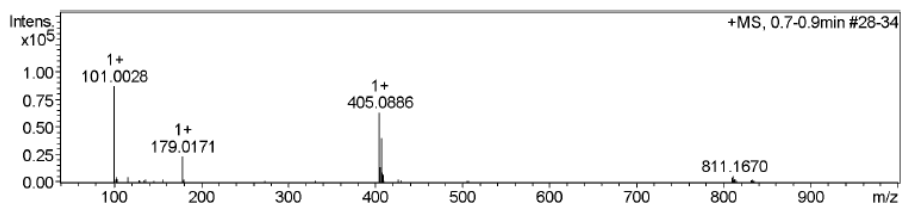

| #  | m/z      | I %   |
|----|----------|-------|
| 1  | 101.0028 | 100.0 |
| 2  | 102.0054 | 3.3   |
| 3  | 102.9988 | 5.9   |
| 4  | 104.1069 | 4.0   |
| 5  | 116.9773 | 6.4   |
| 6  | 137.0016 | 2.9   |
| 7  | 157.0359 | 2.9   |
| 8  | 179.0171 | 27.3  |
| 9  | 181.0142 | 2.9   |
| 10 | 405.0886 | 72.6  |
| 11 | 406.0916 | 16.0  |
| 12 | 407.0859 | 46.7  |
| 13 | 408.0869 | 10.8  |
| 14 | 409.0846 | 8.4   |
| 15 | 427.0733 | 2.8   |
| 16 | 809.1675 | 5.1   |
| 17 | 811.1670 | 6.8   |
| 18 | 812.1694 | 2.9   |
| 19 | 813.1632 | 3.5   |
| 20 | 833.1458 | 3.2   |

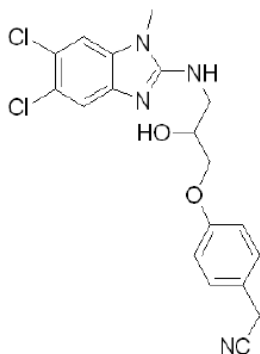

**Generate Molecular Formula Paramete**

| Charge                  | Tolerance         | sigma limit | H/C Ratio | Electron Contr.   | Nitrogen Rule               | Chrom.Background | Calibration |
|-------------------------|-------------------|-------------|-----------|-------------------|-----------------------------|------------------|-------------|
| +1                      | 6 ppm             | 0.08        | 3 - 0     | both              | false                       | false            | TRUE        |
| <b>Expected Formula</b> | C21 H22 Cl2 N4 O2 |             |           | <b>Adduct(s):</b> | H, Na, NH4, C3H5N2, radical |                  |             |

Note: Sigma fits < 0.05 indicates high probability of correct MF

Figure S6. HRMS spectrum of **6c**.

+MS, 0.7-0.9min #28-34

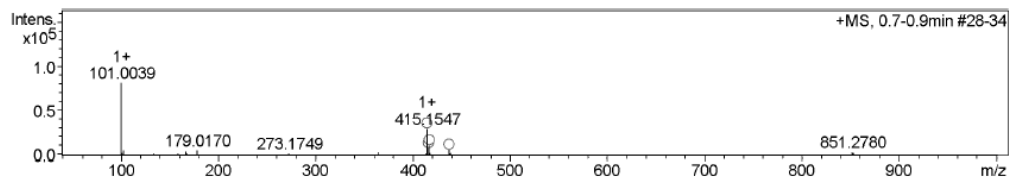

| #  | m/z      | I %   |
|----|----------|-------|
| 1  | 101.0039 | 100.0 |
| 2  | 102.0065 | 3.3   |
| 3  | 102.9999 | 6.0   |
| 4  | 134.0813 | 2.1   |
| 5  | 167.1158 | 5.5   |
| 6  | 168.9902 | 1.5   |
| 7  | 179.0170 | 6.5   |
| 8  | 273.1749 | 2.1   |
| 9  | 365.1078 | 3.9   |
| 10 | 413.1776 | 1.9   |
| 11 | 415.1547 | 36.4  |
| 12 | 416.1563 | 9.1   |
| 13 | 417.1518 | 12.9  |
| 14 | 418.1531 | 3.1   |
| 15 | 437.1360 | 7.3   |
| 16 | 438.1403 | 1.7   |
| 17 | 439.1336 | 2.7   |
| 18 | 851.2780 | 4.2   |
| 19 | 852.2757 | 2.2   |
| 20 | 853.2769 | 3.2   |

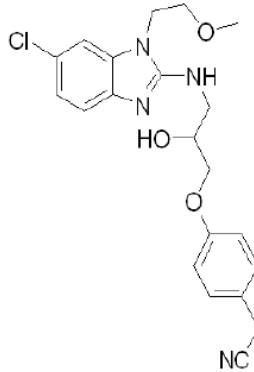

Generate Molecular Formula Parameters

No of Most Intense MS Peaks Analysed 5

| Charge | Tolerance | sigma_limit | Calibration |
|--------|-----------|-------------|-------------|
| +1     | 6 ppm     | 0.08        | TRUE        |

Formula Min C 1 H 0 N 0 O 0      Formula Max C50 H100 N10 O10 H Na NH4 C3H5N2

| # | meas. m/z | theo. m/z | Err [ppm] | Sigma  | Formula                |
|---|-----------|-----------|-----------|--------|------------------------|
| 2 | 417.1518  | 417.1520  | 0.50      | 0.0038 | C 19 H 20 N 7 Na 1 O 3 |
|   |           | 417.1533  | 3.70      | 0.0040 | C 21 H 22 N 4 Na 1 O 4 |
|   |           | 417.1531  | 3.10      | 0.0040 | C 20 H 23 N 3 O 7      |
|   |           | 417.1530  | 3.10      | 0.0042 | C 19 H 17 N 10 O 2     |
|   |           | 417.1517  | 0.20      | 0.0061 | C 17 H 15 N 13 O 1     |

Note: Sigma fits < 0.05 indicates high probability of correct MF

Figure S7. HRMS spectrum of **6t**.

|                 |                                 |                  |                      |
|-----------------|---------------------------------|------------------|----------------------|
| Sample-ID       | pazfs2_005                      | Lab              | C13                  |
| Submitter       | Fadi Soukarieh (pazfs2)         | Supervisor       | Mike Stocks (pazmjs) |
| Analysis Name   | pazfs2_005_653078_7_01_133763.d | Acquisition Date | 8/9/2023 10:43:23 AM |
| Ionisation Mode | ESI Positive                    | Instrument       | Bruker MicroTOF      |

+MS, 0.7-0.9min #27-33

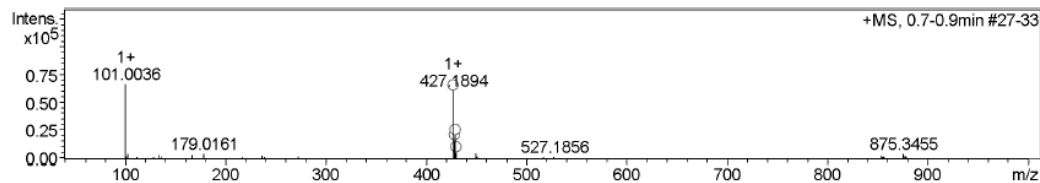

| #  | m/z      | I %   |
|----|----------|-------|
| 1  | 101.0036 | 100.0 |
| 2  | 102.0060 | 3.4   |
| 3  | 102.9999 | 5.8   |
| 4  | 134.0808 | 5.1   |
| 5  | 137.0016 | 2.8   |
| 6  | 167.1152 | 5.1   |
| 7  | 179.0161 | 5.9   |
| 8  | 237.1141 | 4.2   |
| 9  | 273.1758 | 2.8   |
| 10 | 427.1894 | 91.0  |
| 11 | 428.1919 | 23.9  |
| 12 | 429.1874 | 32.0  |
| 13 | 430.1906 | 8.0   |
| 14 | 449.1710 | 7.1   |
| 15 | 451.1675 | 2.7   |
| 16 | 853.3696 | 4.3   |
| 17 | 855.3724 | 3.1   |
| 18 | 875.3455 | 5.6   |
| 19 | 876.3515 | 3.0   |
| 20 | 877.3517 | 4.4   |

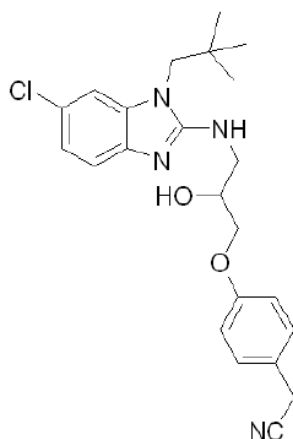

Generate Molecular Formula

tense MS Peaks Analysed 5

| Charge | Tolerance | sigma_lim | Comparison |
|--------|-----------|-----------|------------|
| +1     | 6 ppm     | 0.08      | TRUE       |

| # | meas. m/z | theo. m/z | Err [ppm] | Sigma  | Formula                 |
|---|-----------|-----------|-----------|--------|-------------------------|
| 2 | 429.1874  | 429.1894  | 4.80      | 0.0029 | C 22 H 27 N 3 O 6       |
|   |           | 429.1884  | 2.30      | 0.0032 | C 22 H 30 Na 1 O 7      |
|   |           | 429.1881  | 1.70      | 0.0050 | C 20 H 25 N 6 O 5       |
|   |           | 429.1884  | 2.30      | 0.0065 | C 21 H 24 N 7 Na 1 O 2  |
|   |           | 429.1870  | 0.80      | 0.0083 | C 19 H 22 N 10 Na 1 O 1 |
| 4 | 430.1906  | 430.1881  | 5.70      | 0.0167 | C 11 H 25 N 11 Na 1 O 6 |
|   |           | 430.1895  | 2.60      | 0.0168 | C 13 H 27 N 8 Na 1 O 7  |

Figure S8. HRMS spectrum of **6h**.

|                 |                                 |                  |                      |
|-----------------|---------------------------------|------------------|----------------------|
| Sample-ID       | pazfs2_006                      | Lab              | C13                  |
| Submitter       | Fadi Soukarieh (pazfs2)         | Supervisor       | Mike Stocks (pazmjs) |
| Analysis Name   | pazfs2_006_653079_8_01_133764.d | Acquisition Date | 8/9/2023 10:45:53 AM |
| Ionisation Mode | ESI Positive                    | Instrument       | Bruker MicroTOF      |

+MS, 0.7-0.9min #28-34

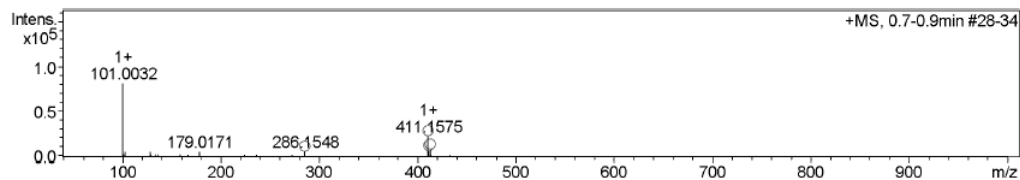

| #  | m/z      | I %   |
|----|----------|-------|
| 1  | 101.0032 | 100.0 |
| 2  | 102.0056 | 3.5   |
| 3  | 102.9990 | 6.3   |
| 4  | 129.0125 | 5.8   |
| 5  | 130.0110 | 1.8   |
| 6  | 134.0808 | 3.3   |
| 7  | 137.0010 | 2.9   |
| 8  | 158.9633 | 2.9   |
| 9  | 167.1170 | 1.8   |
| 10 | 179.0171 | 6.1   |
| 11 | 225.0114 | 1.8   |
| 12 | 236.9792 | 1.8   |
| 13 | 273.1758 | 2.1   |
| 14 | 286.1548 | 6.4   |
| 15 | 292.9943 | 1.5   |
| 16 | 411.1575 | 26.9  |
| 17 | 412.1616 | 7.1   |
| 18 | 413.1560 | 9.4   |
| 19 | 414.1579 | 2.5   |
| 20 | 433.1407 | 2.3   |

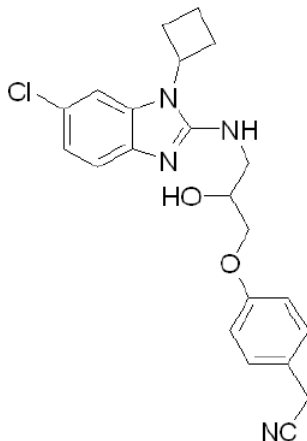

Generate Molecular Formula P

no. of most intense MS Peaks Analysed 5

| Charge | Tolerance | sigma_limit | Calibration |
|--------|-----------|-------------|-------------|
| +1     | 6 ppm     | 0.08        | TRUE        |

Formula Min C 1 H 0 N 0 O 0      Formula Max C50 H100 N10 O10 H Na NH4 C3H5N2

| # | meas. m/z | theo. m/z | Err [ppm] | Sigma  | Formula                |
|---|-----------|-----------|-----------|--------|------------------------|
| 2 | 413.1560  | 413.1584  | 5.90      | 0.0088 | C 22 H 22 N 4 Na 1 O 3 |
|   |           | 413.1581  | 5.30      | 0.0114 | C 20 H 17 N 10 O 1     |
|   |           | 413.1581  | 5.30      | 0.0122 | C 21 H 23 N 3 O 6      |
|   |           | 413.1571  | 2.70      | 0.0144 | C 20 H 20 N 7 Na 1 O 2 |
|   |           | 413.1568  | 2.00      | 0.0167 | C 18 H 15 N 13         |
| 4 | 286.1548  | 286.1550  | 0.80      | 0.0061 | C 16 H 20 N 3 O 2      |
|   |           | 286.1563  | 5.50      | 0.0079 | C 18 H 22 O 3          |

Figure S9. HRMS spectrum of **6j**.

|                 |                                 |                  |                      |
|-----------------|---------------------------------|------------------|----------------------|
| Sample-ID       | pazfs2_007                      | Lab              | C13                  |
| Submitter       | Fadi Soukarieh (pazfs2)         | Supervisor       | Mike Stocks (pazmjs) |
| Analysis Name   | pazfs2_007_653080_9_01_133765.d | Acquisition Date | 8/9/2023 10:48:23 AM |
| Ionisation Mode | ESI Positive                    | Instrument       | Bruker MicroTOF      |

+MS, 0.7-0.9min #28-34

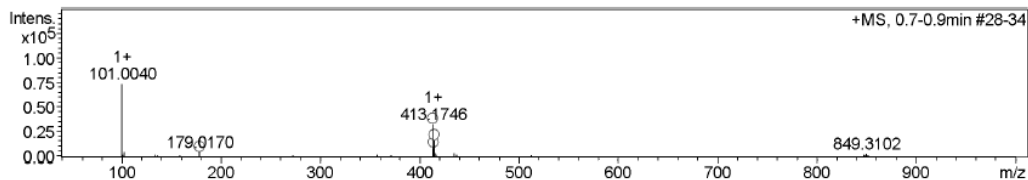

| #  | m/z      | I %   |
|----|----------|-------|
| 1  | 101.0040 | 100.0 |
| 2  | 102.0061 | 3.5   |
| 3  | 103.0002 | 5.9   |
| 4  | 134.0816 | 3.3   |
| 5  | 137.0021 | 1.8   |
| 6  | 179.0170 | 6.0   |
| 7  | 273.1757 | 1.8   |
| 8  | 357.1091 | 3.3   |
| 9  | 413.1746 | 44.6  |
| 10 | 414.1762 | 11.7  |
| 11 | 415.1666 | 22.4  |
| 12 | 416.1689 | 5.5   |
| 13 | 417.1542 | 3.4   |
| 14 | 435.1555 | 5.6   |
| 15 | 437.1462 | 3.1   |
| 16 | 513.1700 | 1.8   |
| 17 | 847.3205 | 3.0   |
| 18 | 849.3102 | 3.7   |
| 19 | 850.3139 | 1.8   |
| 20 | 851.3059 | 1.7   |

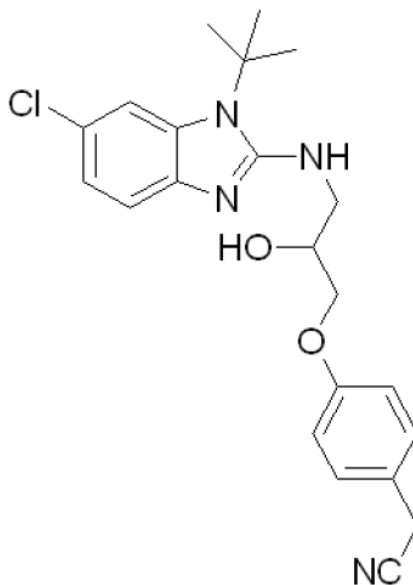

**Generate Molecular Formula Parameter:**

| Charge | Tolerance | sigma_limit | C |
|--------|-----------|-------------|---|
| +1     | 6 ppm     | 0.08        |   |

Formula Min C 1 H 0 N 0 O 0

| # | meas. m/z | theo. m/z | [Err][ppm] |        |                    |                    |
|---|-----------|-----------|------------|--------|--------------------|--------------------|
| 1 | 413.1746  | 413.1721  | 6.10       |        |                    |                    |
|   |           | 413.1723  | 5.40       | U.0z6r | C 25 H 26 Na 1 O 4 |                    |
|   |           | 413.1734  | 2.80       | 0.0293 |                    | C 25 H 23 N 3 O 3  |
|   |           | 413.1737  | 2.20       | 0.0323 |                    | C 26 H 22 N 4 Na 1 |
|   |           | 413.1747  | 0.40       | 0.0352 |                    | C 27 H 25 O 4      |
| 2 | 415.1666  | 415.1642  | 5.90       | 0.0305 | C 24 H 20 N 6 Na 1 |                    |
|   |           | 415.1652  | 3.30       | 0.0332 |                    | C 25 H 23 N 2 O 4  |

Figure S10. HRMS spectrum of **6g**.

|                 |                                  |                  |                      |
|-----------------|----------------------------------|------------------|----------------------|
| Sample-ID       | pazfs2_008                       | Lab              | C13                  |
| Submitter       | Fadi Soukariah (pazfs2)          | Supervisor       | Mike Stocks (pazmjs) |
| Analysis Name   | pazfs2_008_653081_10_01_133766.d | Acquisition Date | 8/9/2023 10:50:52 AM |
| Ionisation Mode | ESI Positive                     | Instrument       | Bruker MicroTOF      |

+MS, 0.7-0.9min #28-34

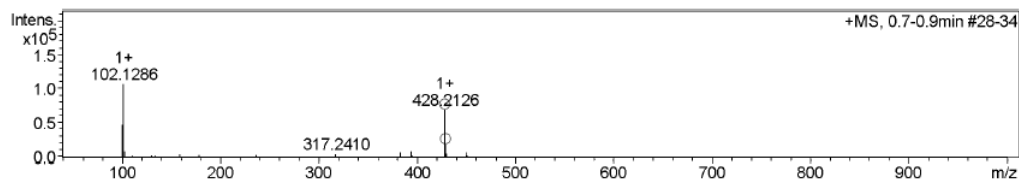

| #  | m/z      | I %   |
|----|----------|-------|
| 1  | 101.0041 | 44.2  |
| 2  | 102.1286 | 100.0 |
| 3  | 103.0004 | 2.9   |
| 4  | 103.1316 | 7.9   |
| 5  | 111.0932 | 1.7   |
| 6  | 130.1593 | 2.2   |
| 7  | 134.0810 | 1.8   |
| 8  | 158.9636 | 3.7   |
| 9  | 179.0170 | 3.0   |
| 10 | 236.9775 | 2.5   |
| 11 | 317.2410 | 4.0   |
| 12 | 383.1532 | 6.6   |
| 13 | 384.1596 | 1.5   |
| 14 | 394.2239 | 7.7   |
| 15 | 395.2284 | 1.9   |
| 16 | 428.2126 | 64.7  |
| 17 | 429.2150 | 17.0  |
| 18 | 430.2134 | 5.5   |
| 19 | 450.1931 | 5.9   |
| 20 | 451.1972 | 1.6   |

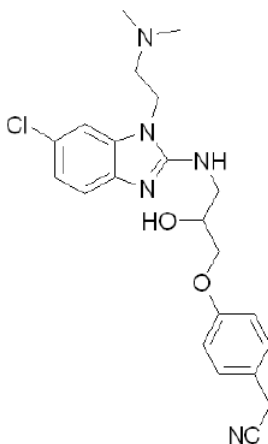

Generate Molecular Formula Parameters

No of Most Intense MS Peaks Analysed 5

| Charge | Tolerance | sigma_limit | Calibration |
|--------|-----------|-------------|-------------|
| +1     | 6 ppm     | 0.08        | TRUE        |

Formula Min C 1 H 0 N 0 O 0      Formula Max C50 H100 N10 O10 H Na NH4 C3H5N2

| # | meas. m/z | theo. m/z | Err [ppm] | Sigma  | Formula                |
|---|-----------|-----------|-----------|--------|------------------------|
| 1 | 428.2126  | 428.2142  | 3.80      | 0.0348 | C 19 H 29 N 6 Na 1 O 4 |
|   |           | 428.2140  | 3.10      | 0.0372 | C 17 H 24 N 12 O 2     |
|   |           | 428.2140  | 3.10      | 0.0379 | C 18 H 30 N 5 O 7      |
|   |           | 428.2129  | 0.70      | 0.0406 | C 17 H 27 N 9 Na 1 O 3 |
|   |           | 428.2111  | 3.70      | 0.0415 | C 30 H 29 Na 1 O 1     |
| 2 | 429.2150  | 429.2175  | 6.00      | 0.0110 | C 28 H 28 N 3 Na 1     |
|   |           | 429.2173  | 5.30      | 0.0150 | C 27 H 29 N 2 O 3      |

Figure S11. HRMS spectrum of **6q**.

|                 |                                  |                  |                      |
|-----------------|----------------------------------|------------------|----------------------|
| Sample-ID       | pazfs2_021                       | Lab              | C13                  |
| Submitter       | Fadi Soukariéh (pazfs2)          | Supervisor       | Mike Stocks (pazmjs) |
| Analysis Name   | pazfs2_021_653086_12_01_133769.d | Acquisition Date | 8/9/2023 12:21:18 PM |
| Ionisation Mode | ESI Positive                     | Instrument       | Bruker MicroTOF      |

+MS, 0.7-0.9min #27-33

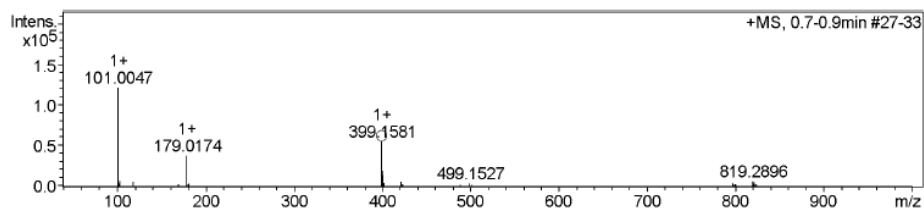

| #  | m/z      | I %   |
|----|----------|-------|
| 1  | 101.0047 | 100.0 |
| 2  | 102.0070 | 3.4   |
| 3  | 103.0011 | 5.8   |
| 4  | 118.1239 | 4.7   |
| 5  | 168.9908 | 2.1   |
| 6  | 179.0174 | 31.2  |
| 7  | 180.0189 | 2.0   |
| 8  | 181.0132 | 3.1   |
| 9  | 399.1581 | 45.2  |
| 10 | 400.1610 | 11.2  |
| 11 | 401.1542 | 15.9  |
| 12 | 402.1572 | 3.7   |
| 13 | 421.1396 | 4.8   |
| 14 | 499.1527 | 3.2   |
| 15 | 797.3108 | 3.3   |
| 16 | 799.3009 | 2.5   |
| 17 | 819.2896 | 5.6   |
| 18 | 820.2915 | 2.8   |
| 19 | 821.2826 | 4.4   |
| 20 | 822.2857 | 2.0   |

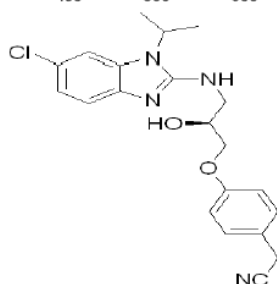

**Generate Molecular Formula Parameters**

| Charge                  | Tolerance         | sigma limit | H/C Ratio | Electron Conf.    | Nitrogen Rule | Chrom.BackGround            | Calibration |
|-------------------------|-------------------|-------------|-----------|-------------------|---------------|-----------------------------|-------------|
| +1                      | 6 ppm             | 0.08        | 3 - 0     | both              | false         | false                       | TRUE        |
| <b>Expected Formula</b> | C21 H24 Cl1 N4 O2 |             |           | <b>Adduct(s):</b> |               | H, Na, NH4, C3H5N2, radical |             |
| #                       | meas. m/z         | theo. m/z   | Err [ppm] | Sigma             | Formula       | Adduct                      | Adduct Mass |
| 1                       | 399.1581          | 399.1582    | 0.20      | 0.0016            | C21H24ClN4O2  | M+                          | -0.0005     |

Note: Sigma fits < 0.05 indicates high probability of correct MF

Figure S12. HRMS spectrum of **6v**.

|                 |                                  |                  |                      |
|-----------------|----------------------------------|------------------|----------------------|
| Sample-ID       | pazfs2_025                       | Lab              | C13                  |
| Submitter       | Fadi Soukariéh (pazfs2)          | Supervisor       | Mike Stocks (pazmjs) |
| Analysis Name   | pazfs2_025_653087_13_01_133770.d | Acquisition Date | 8/9/2023 12:23:48 PM |
| Ionisation Mode | ESI Positive                     | Instrument       | Bruker MicroTOF      |

+MS, 0.7-0.9min #28-34

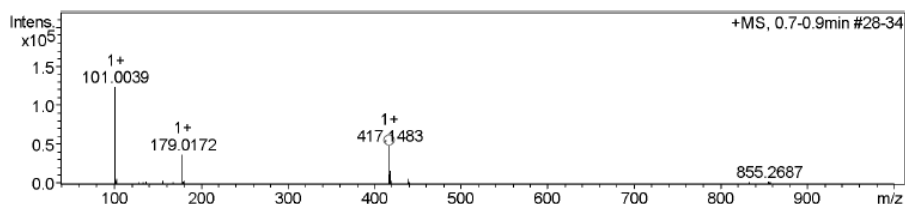

| #  | m/z      | I %   |
|----|----------|-------|
| 1  | 101.0039 | 100.0 |
| 2  | 102.0063 | 3.4   |
| 3  | 103.0001 | 5.7   |
| 4  | 134.0823 | 1.7   |
| 5  | 137.0021 | 1.9   |
| 6  | 157.0356 | 3.2   |
| 7  | 168.9924 | 1.5   |
| 8  | 179.0172 | 30.0  |
| 9  | 180.0192 | 1.9   |
| 10 | 181.0133 | 3.2   |
| 11 | 417.1483 | 39.7  |
| 12 | 418.1514 | 10.0  |
| 13 | 419.1459 | 13.9  |
| 14 | 420.1485 | 3.3   |
| 15 | 439.1315 | 5.2   |
| 16 | 440.1303 | 1.3   |
| 17 | 441.1285 | 1.8   |
| 18 | 833.2846 | 1.3   |
| 19 | 855.2687 | 2.4   |
| 20 | 857.2652 | 1.9   |

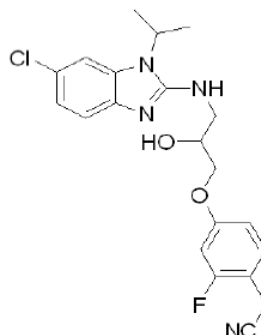

**Generate Molecular Formula Parameters**

| Charge                  | Tolerance            | sigma limit | H/C Ratio | Electron Conf. | Nitrogen Rule     | Chrom.BackGround            | Calibration |
|-------------------------|----------------------|-------------|-----------|----------------|-------------------|-----------------------------|-------------|
| +1                      | 6 ppm                | 0.08        | 3 - 0     | both           | false             | false                       | TRUE        |
| <b>Expected Formula</b> | C21 H23 Cl1 F1 N4 O2 |             |           |                | <b>Adduct(s):</b> | H, Na, NH4, C3H5N2, radical |             |
| #                       | meas. m/z            | theo. m/z   | Err [ppm] | Sigma          | Formula           | Adduct                      | Adduct Mass |
| 1                       | 417.1483             | 417.1488    | 1.10      | 0.0039         | C21H23ClF1N4O2    | M+                          | -0.0005     |

Note: Sigma fits < 0.05 indicates high probability of correct MF

Figure S13. HRMS spectrum of **60**.



+MS, 0.7-0.9min #28-34

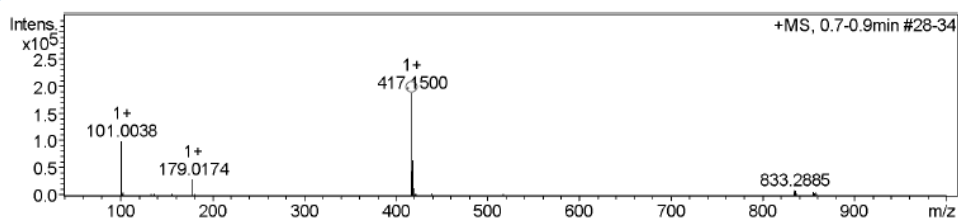

| #  | m/z      | I %   |
|----|----------|-------|
| 1  | 101.0038 | 53.0  |
| 2  | 102.0062 | 1.8   |
| 3  | 102.9997 | 3.1   |
| 4  | 134.0815 | 1.6   |
| 5  | 157.0362 | 1.8   |
| 6  | 179.0174 | 15.8  |
| 7  | 181.0126 | 1.6   |
| 8  | 417.1500 | 100.0 |
| 9  | 418.1524 | 24.4  |
| 10 | 419.1474 | 34.4  |
| 11 | 420.1503 | 7.8   |
| 12 | 439.1327 | 2.2   |
| 13 | 517.1454 | 1.8   |
| 14 | 833.2885 | 5.6   |
| 15 | 834.2925 | 2.7   |
| 16 | 835.2883 | 4.3   |
| 17 | 836.2868 | 1.9   |
| 18 | 855.2703 | 3.9   |
| 19 | 856.2732 | 2.0   |
| 20 | 857.2697 | 2.9   |

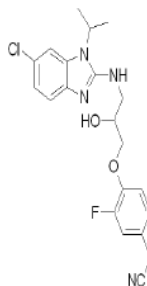

Generate Molecular Formula Parameters

| Charge                  | Tolerance | sigma limit          | H/C Ratio | Electron Conf. | Nitrogen Rule     | Chrom.BackGround | Calibration                 |
|-------------------------|-----------|----------------------|-----------|----------------|-------------------|------------------|-----------------------------|
| +1                      | 6 ppm     | 0.08                 | 3 - 0     | both           | false             | false            | TRUE                        |
| <b>Expected Formula</b> |           | C21 H23 Cl1 F1 N4 O2 |           |                | <b>Adduct(s):</b> |                  | H, Na, NH4, C3H5N2, radical |
| #                       | meas. m/z | theo. m/z            | Err [ppm] | Sigma          | Formula           | Adduct           | Adduct Mass                 |
| 1                       | 417.1500  | 417.1488             | 2.90      | 0.0042         | C21H23ClF1N4O2    | M+               | -0.0005                     |

Note: Sigma fits < 0.05 indicates high probability of correct MF

Figure S14. HRMS spectrum of **6n**.

|                 |                                     |                  |                      |
|-----------------|-------------------------------------|------------------|----------------------|
| Sample-ID       | pazfs2_sen086                       | Lab              | C13                  |
| Submitter       | Fadi Soukarieh (pazfs2)             | Supervisor       | Mike Stocks (pazmjs) |
| Analysis Name   | pazfs2_sen086_653089_15_01_133772.d | Acquisition Date | 8/9/2023 12:28:48 PM |
| Ionisation Mode | ESI Positive                        | Instrument       | Bruker MicroTOF      |

+MS, 0.7-0.9min #28-34

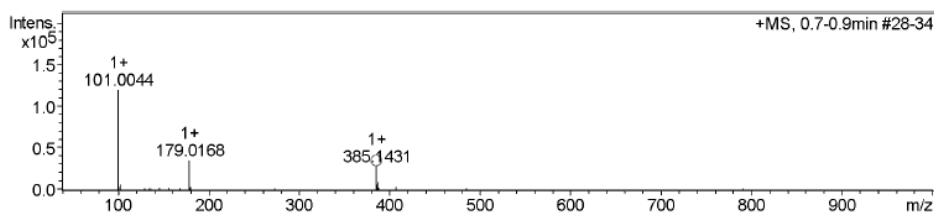

| #  | m/z      | I %   |
|----|----------|-------|
| 1  | 101.0044 | 100.0 |
| 2  | 102.0071 | 3.3   |
| 3  | 103.0004 | 5.9   |
| 4  | 130.1595 | 1.4   |
| 5  | 134.0815 | 1.5   |
| 6  | 137.0031 | 1.7   |
| 7  | 146.1539 | 2.0   |
| 8  | 157.0351 | 2.6   |
| 9  | 168.9927 | 1.7   |
| 10 | 179.0168 | 29.6  |
| 11 | 180.0202 | 1.9   |
| 12 | 181.0132 | 2.9   |
| 13 | 273.1687 | 1.2   |
| 14 | 385.1431 | 23.8  |
| 15 | 386.1458 | 5.7   |
| 16 | 387.1402 | 8.7   |
| 17 | 388.1407 | 2.0   |
| 18 | 407.1266 | 2.7   |
| 19 | 485.1384 | 1.2   |
| 20 | 791.2580 | 1.3   |

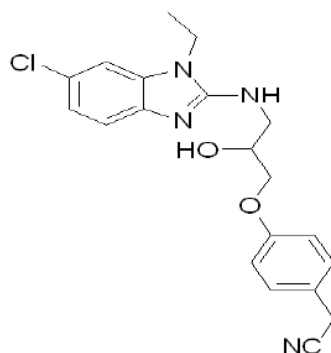

#### Generate Molecular Formula Parameters

| Charge                  | Tolerance | sigma limit       | H/C Ratio | Electron Conf. | Nitrogen Rule     | Chrom.BackGround | Calibration                 |
|-------------------------|-----------|-------------------|-----------|----------------|-------------------|------------------|-----------------------------|
| +1                      | 6 ppm     | 0.08              | 3 - 0     | both           | false             | false            | TRUE                        |
| <b>Expected Formula</b> |           | C20 H22 Cl1 N4 O2 |           |                | <b>Adduct(s):</b> |                  | H, Na, NH4, C3H5N2, radical |
| #                       | meas. m/z | theo. m/z         | Err [ppm] | Sigma          | Formula           | Adduct           | Adduct Mass                 |
| 1                       | 385.1431  | 385.1426          | 1.40      | 0.0073         | C20H22ClN4O2      | M+               | -0.0005                     |

Note: Sigma fits < 0.05 indicates high probability of correct MF

Figure S15. HRMS spectrum of **6e**.

|                 |                                    |                  |                      |
|-----------------|------------------------------------|------------------|----------------------|
| Sample-ID       | pazfs2_SEN086_Me                   | Lab              | C13                  |
| Submitter       | Fadi Soukarieh (pazfs2)            | Supervisor       | Mike Stocks (pazmjs) |
| Analysis Name   | pazfs2_SEN086_Me_653090_16_01_1337 | Acquisition Date | 8/9/2023 12:31:19 PM |
| Ionisation Mode | Z3, d<br>ESI Positive              | Instrument       | Bruker MicroTOF      |

+MS, 0.7-0.9min #28-34

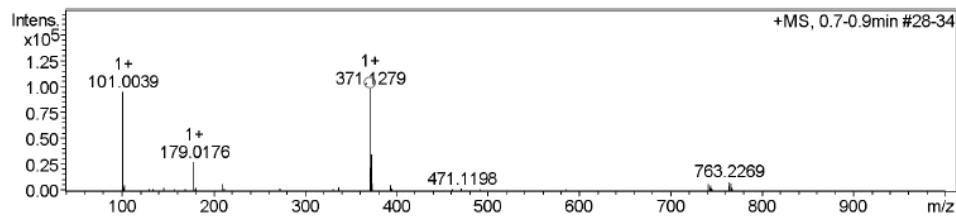

| #  | m/z      | I %   |
|----|----------|-------|
| 1  | 101.0039 | 96.6  |
| 2  | 102.0062 | 3.3   |
| 3  | 103.0003 | 5.9   |
| 4  | 146.1540 | 2.8   |
| 5  | 179.0176 | 28.0  |
| 6  | 181.0145 | 2.7   |
| 7  | 210.0794 | 6.4   |
| 8  | 337.1651 | 3.7   |
| 9  | 371.1279 | 100.0 |
| 10 | 372.1300 | 23.0  |
| 11 | 373.1256 | 35.3  |
| 12 | 374.1277 | 7.7   |
| 13 | 393.1097 | 6.1   |
| 14 | 741.2448 | 6.7   |
| 15 | 742.2481 | 3.1   |
| 16 | 743.2423 | 5.3   |
| 17 | 763.2269 | 9.4   |
| 18 | 764.2334 | 4.7   |
| 19 | 765.2245 | 7.2   |
| 20 | 766.2307 | 3.0   |

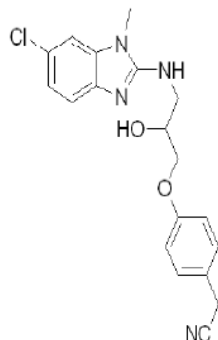

**Generate Molecular Formula Parameters**

| Charge                  | Tolerance                                                        | sigma limit | H/C Ratio | Electron Conf. | Nitrogen Rule                                                   | Chrom.BackGround                                                                | Calibration |
|-------------------------|------------------------------------------------------------------|-------------|-----------|----------------|-----------------------------------------------------------------|---------------------------------------------------------------------------------|-------------|
| +1                      | 6 ppm                                                            | 0.08        | 3 - 0     | both           | false                                                           | false                                                                           | TRUE        |
| <b>Expected Formula</b> | C <sub>19</sub> H <sub>20</sub> Cl N <sub>4</sub> O <sub>2</sub> |             |           |                | <b>Adduct(s):</b>                                               | H, Na, NH <sub>4</sub> , C <sub>3</sub> H <sub>5</sub> N <sub>2</sub> , radical |             |
| #                       | meas. m/z                                                        | theo. m/z   | Err [ppm] | Sigma          | Formula                                                         | Adduct                                                                          | Adduct Mass |
| 1                       | 371.1279                                                         | 371.1269    | 2.60      | 0.0041         | C <sub>19</sub> H <sub>20</sub> ClN <sub>4</sub> O <sub>2</sub> | M+                                                                              | -0.0005     |

Note: Sigma fits < 0.05 indicates high probability of correct MF

Figure S16. HRMS spectrum of **6a**.

+MS, 0.7-0.9min #28-34

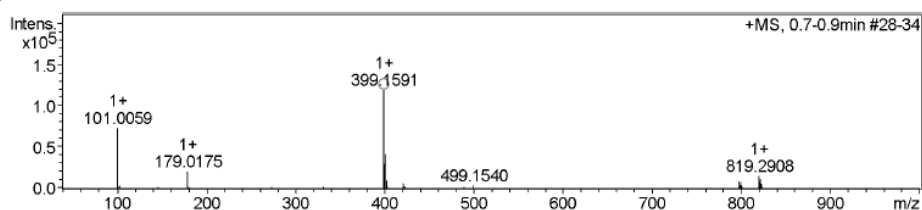

| #  | m/z      | I %   |
|----|----------|-------|
| 1  | 101.0059 | 61.2  |
| 2  | 102.0085 | 2.2   |
| 3  | 103.0020 | 3.4   |
| 4  | 179.0175 | 17.3  |
| 5  | 399.1591 | 100.0 |
| 6  | 400.1623 | 25.1  |
| 7  | 401.1557 | 34.8  |
| 8  | 402.1583 | 8.6   |
| 9  | 421.1404 | 5.7   |
| 10 | 423.1391 | 2.0   |
| 11 | 499.1540 | 2.8   |
| 12 | 797.3091 | 7.8   |
| 13 | 798.3095 | 4.1   |
| 14 | 799.3053 | 6.5   |
| 15 | 800.3066 | 2.8   |
| 16 | 819.2908 | 12.9  |
| 17 | 820.2933 | 6.5   |
| 18 | 821.2869 | 10.2  |
| 19 | 822.2887 | 4.3   |
| 20 | 823.2854 | 2.6   |

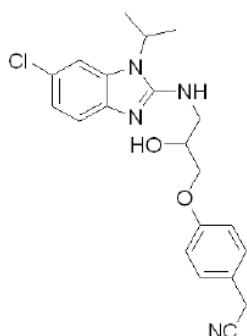

**Generate Molecular Formula Parameters**

| Charge                  | Tolerance         | sigma limit | H/C Ratio | Electron Conf.    | Nitrogen Rule | Chrom.BackGround            | Calibration |
|-------------------------|-------------------|-------------|-----------|-------------------|---------------|-----------------------------|-------------|
| +1                      | 6 ppm             | 0.08        | 3 - 0     | both              | false         | false                       | TRUE        |
| <b>Expected Formula</b> | C21 H24 Cl1 N4 O2 |             |           | <b>Adduct(s):</b> |               | H, Na, NH4, C3H5N2, radical |             |
| #                       | meas. m/z         | theo. m/z   | Err [ppm] | Sigma             | Formula       | Adduct                      | Adduct Mass |
| 1                       | 399.1591          | 399.1582    | 2.20      | 0.0037            | C21H24ClN4O2  | M+                          | -0.0005     |

Note: Sigma fits < 0.05 indicates high probability of correct MF

Figure S17. HRMS spectrum of **6f**.

|                 |                                     |                  |                      |
|-----------------|-------------------------------------|------------------|----------------------|
| Sample-ID       | pazfs2_SEN089                       | Lab              | C13                  |
| Submitter       | Fadi Soukariéh (pazfs2)             | Supervisor       | Mike Stocks (pazmjs) |
| Analysis Name   | pazfs2_SEN089_653091_17_01_133774.d | Acquisition Date | 8/9/2023 12:33:49 PM |
| Ionisation Mode | ESI Positive                        | Instrument       | Bruker MicroTOF      |

+MS, 0.7-0.9min #28-34

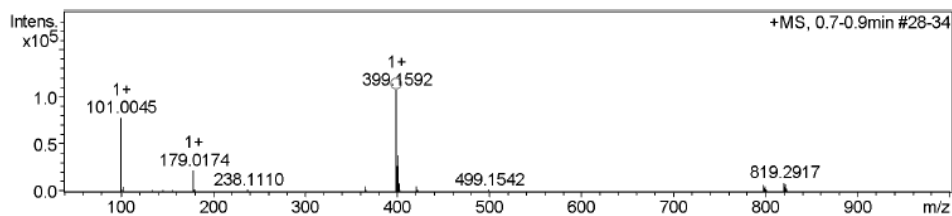

| #  | m/z      | I %   |
|----|----------|-------|
| 1  | 101.0045 | 72.8  |
| 2  | 102.0069 | 2.5   |
| 3  | 103.0011 | 4.2   |
| 4  | 179.0174 | 20.9  |
| 5  | 238.1110 | 2.1   |
| 6  | 365.1964 | 5.2   |
| 7  | 399.1592 | 100.0 |
| 8  | 400.1616 | 24.9  |
| 9  | 401.1562 | 35.4  |
| 10 | 402.1592 | 8.2   |
| 11 | 421.1400 | 5.4   |
| 12 | 499.1542 | 2.6   |
| 13 | 797.3090 | 6.6   |
| 14 | 798.3108 | 3.4   |
| 15 | 799.3072 | 5.4   |
| 16 | 800.3106 | 2.3   |
| 17 | 819.2917 | 9.2   |
| 18 | 820.2941 | 4.8   |
| 19 | 821.2865 | 7.3   |
| 20 | 822.2841 | 3.1   |

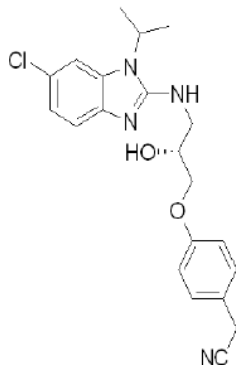

#### Generate Molecular Formula Parameters

| Charge                  | Tolerance | sigma limit       | H/C Ratio  | Electron Conf. | Nitrogen Rule     | Chrom.BackGround | Calibration                 |
|-------------------------|-----------|-------------------|------------|----------------|-------------------|------------------|-----------------------------|
| +1                      | 6 ppm     | 0.08              | 3 - 0      | both           | false             | false            | TRUE                        |
| <b>Expected Formula</b> |           | C21 H24 Cl1 N4 O2 |            |                | <b>Adduct(s):</b> |                  | H, Na, NH4, C3H5N2, radical |
| #                       | meas. m/z | theo. m/z         | [Err][ppm] | Sigma          | Formula           | Adduct           | Adduct Mass                 |
| 1                       | 399.1592  | 399.1582          | 2.40       | 0.0025         | C21H24ClN4O2      | M+               | -0.0005                     |

Note: Sigma fits < 0.05 indicates high probability of correct MF

Figure S18. HRMS spectrum of **6w**.

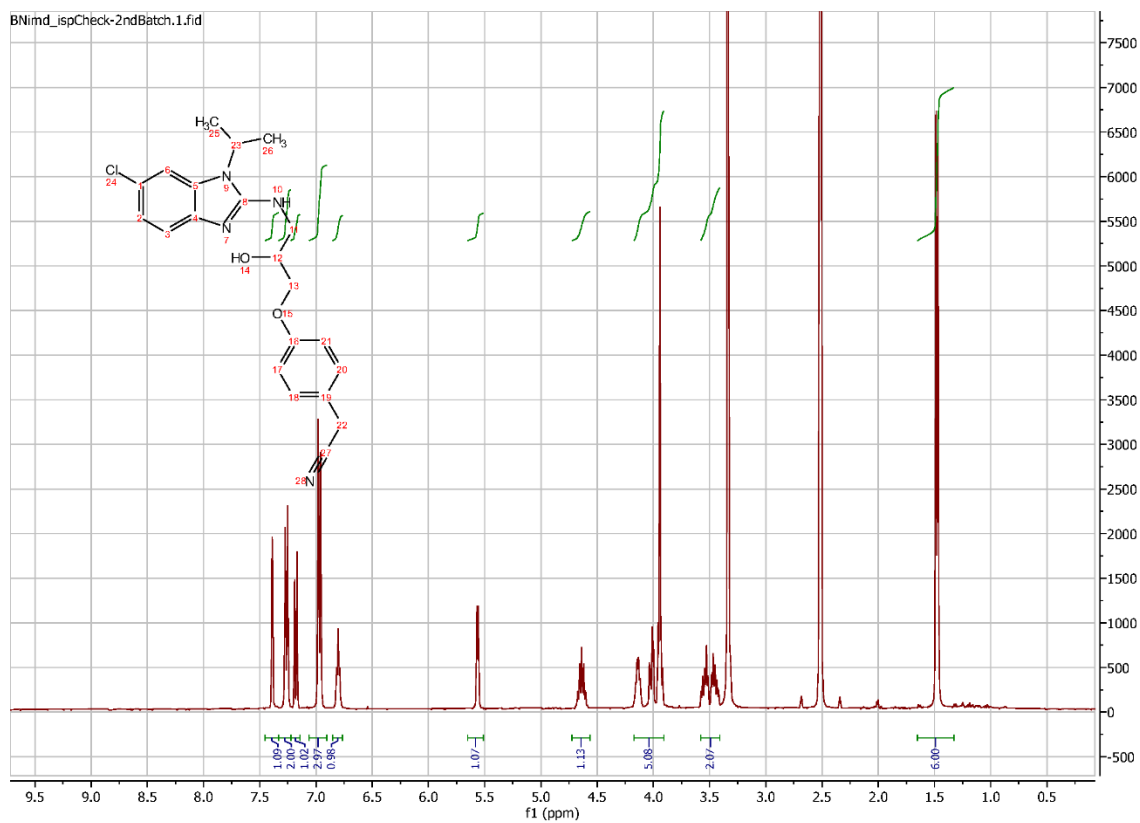

Figure S19. <sup>1</sup>H-NMR spectrum of **6f**.

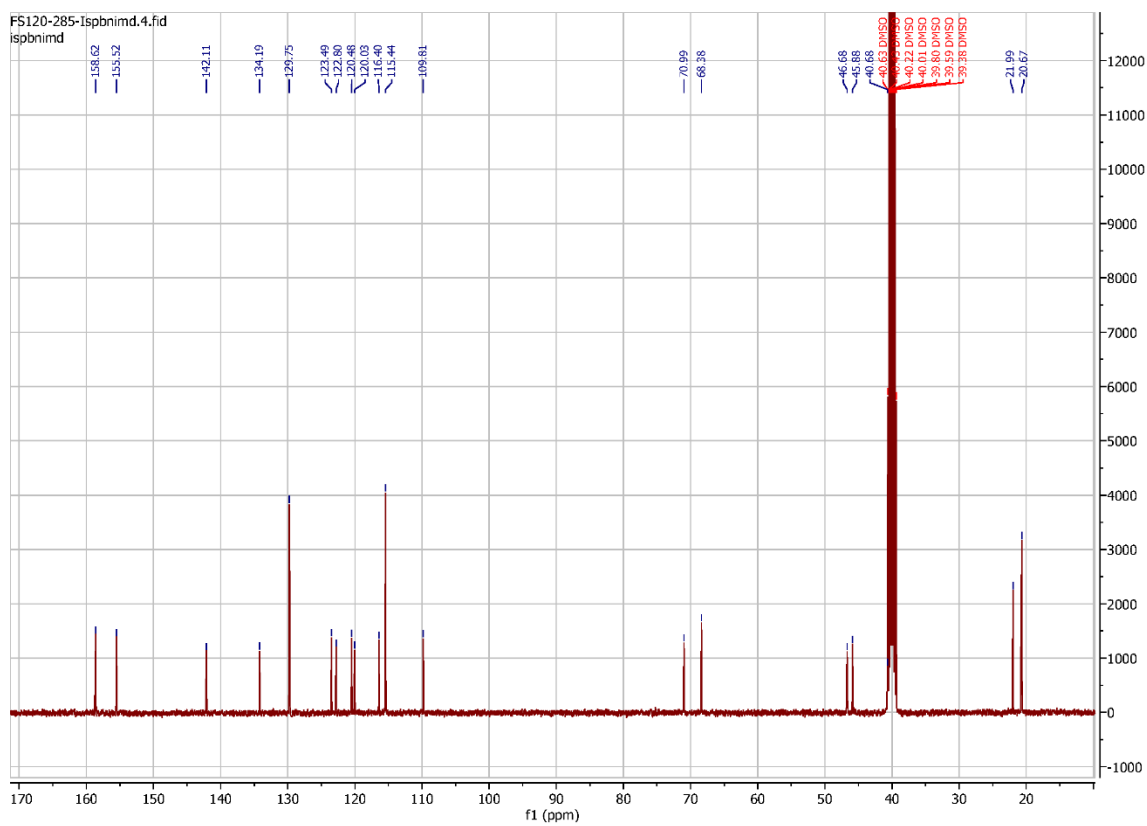

Figure S20. <sup>13</sup>C-NMR spectrum of **6f**.

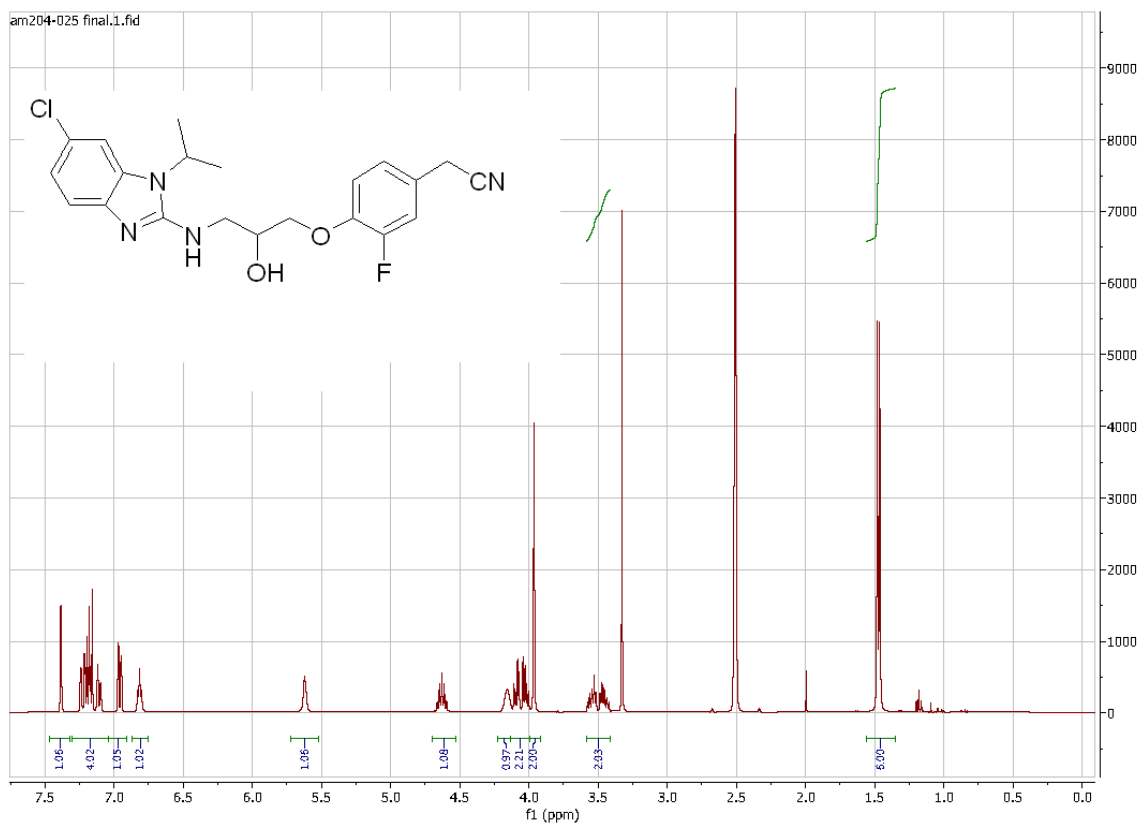

Figure S21.  $^1\text{H-NMR}$  spectrum of **6n**.

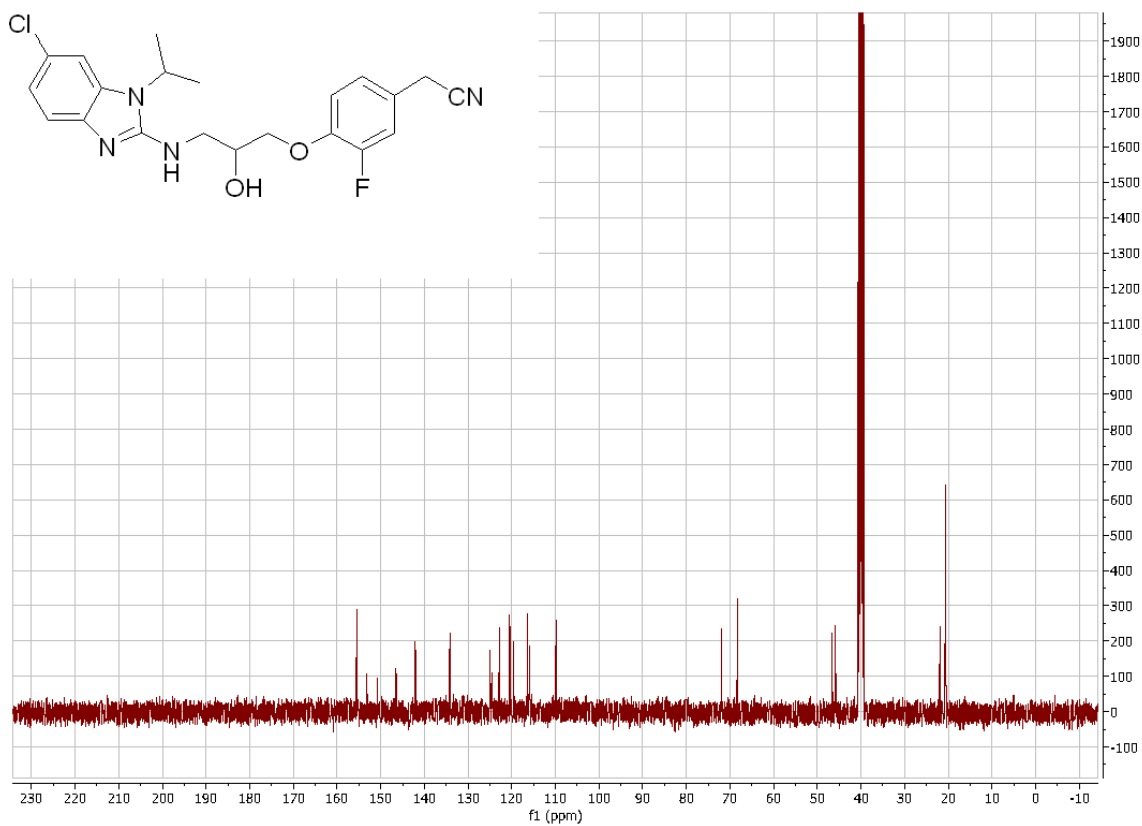

Figure S22.  $^{13}\text{C-NMR}$  spectrum of **6n**.

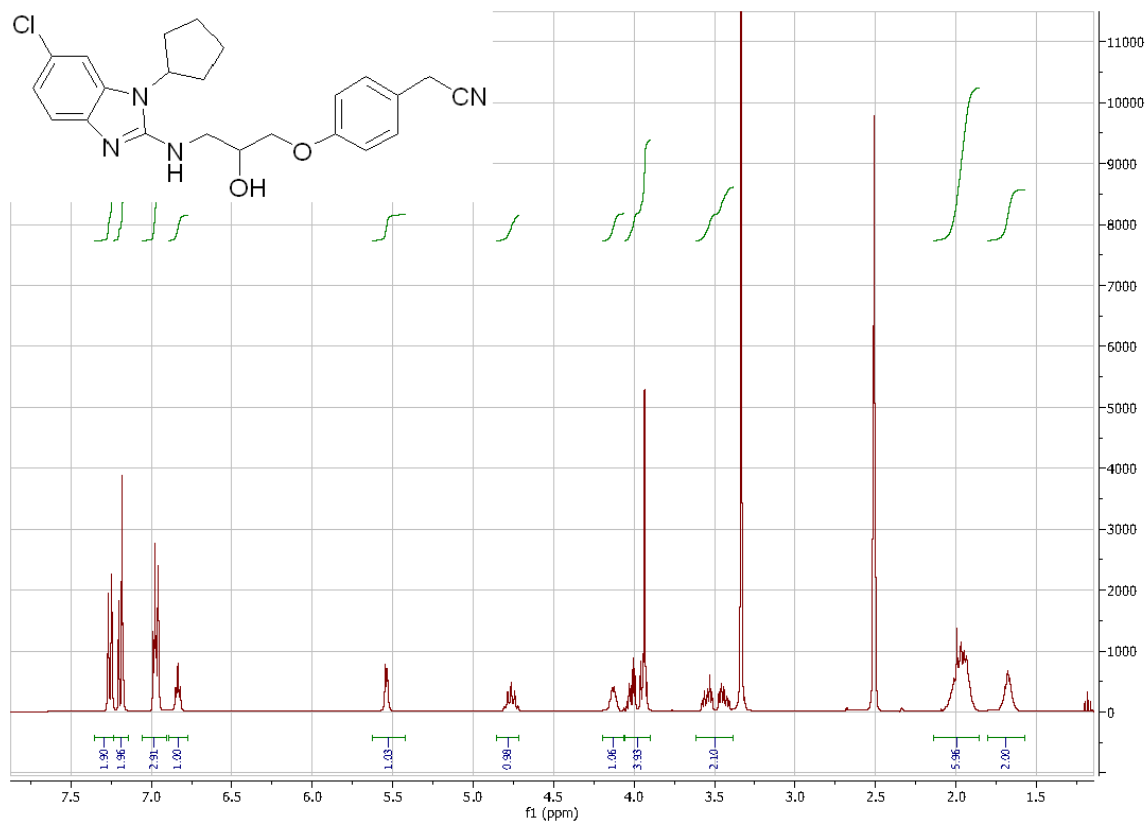

Figure S23. <sup>1</sup>H-NMR spectrum of **6k**.

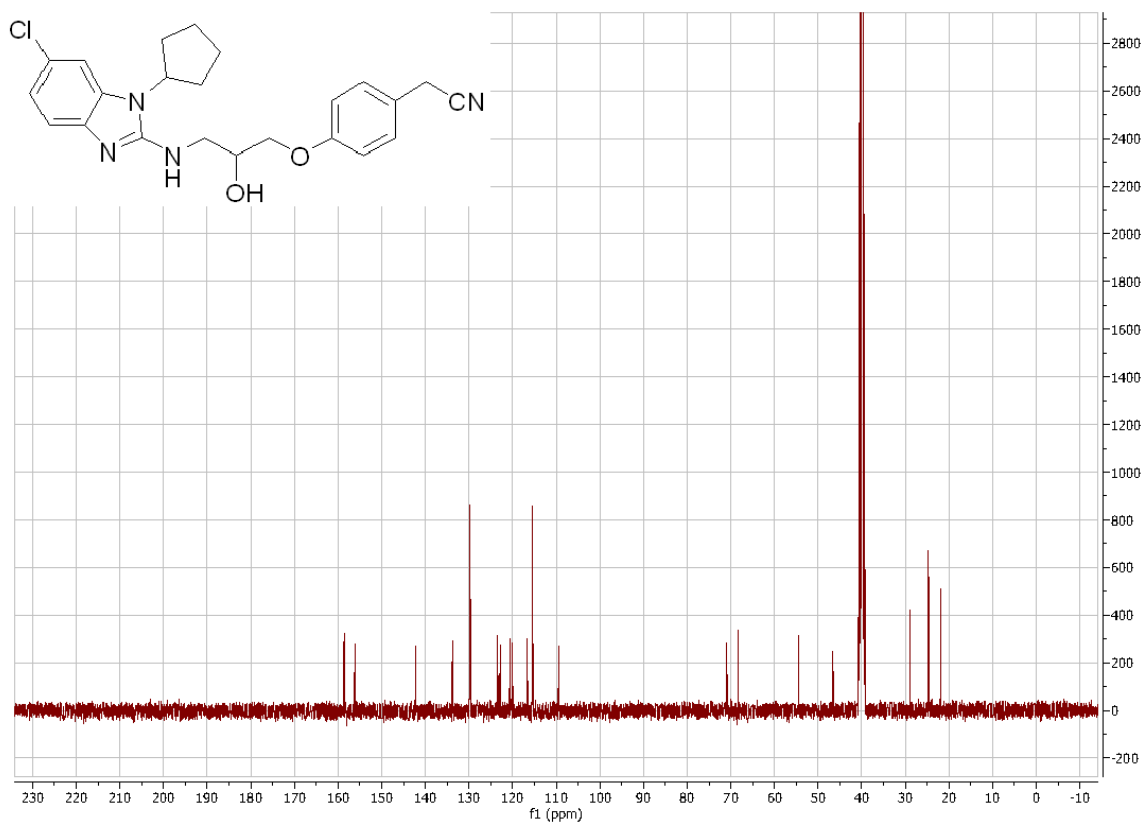

Figure S24. <sup>13</sup>C-NMR spectrum of **6k**.



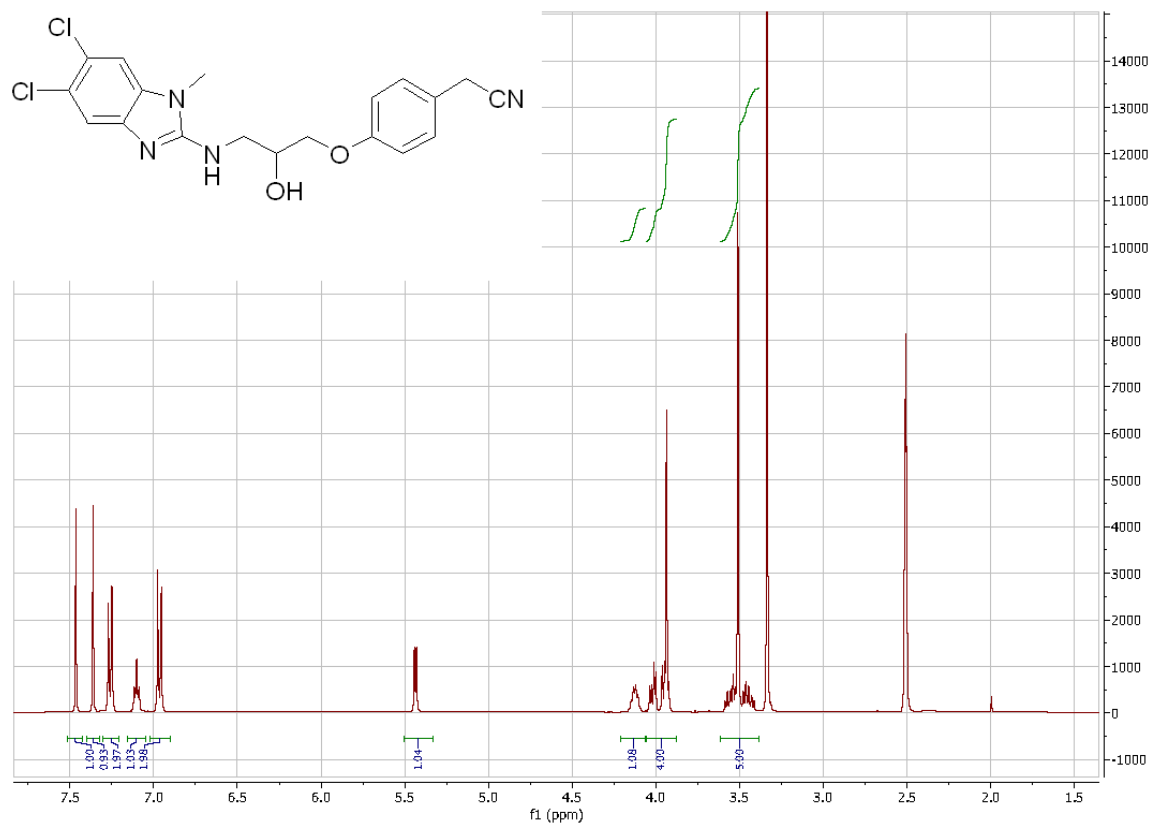

Figure S25. <sup>1</sup>H-NMR spectrum of **6c**.

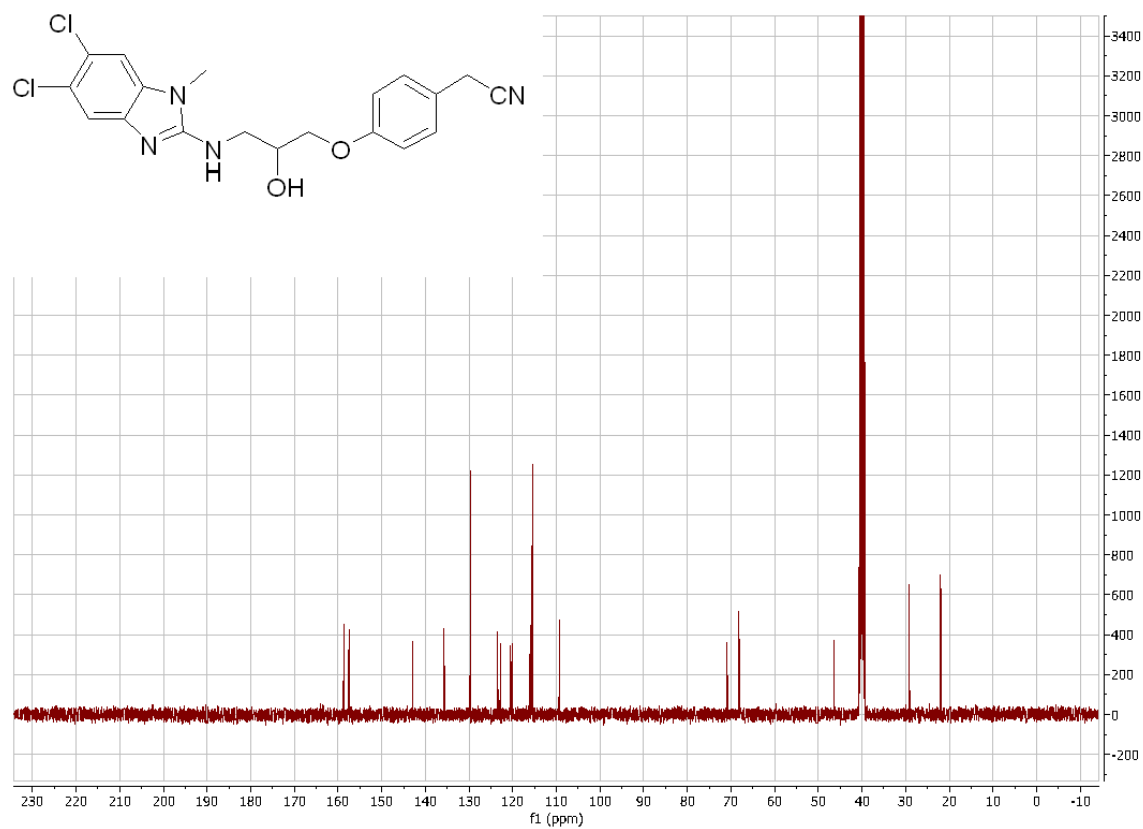

Figure S26. <sup>13</sup>C-NMR spectrum of **6c**

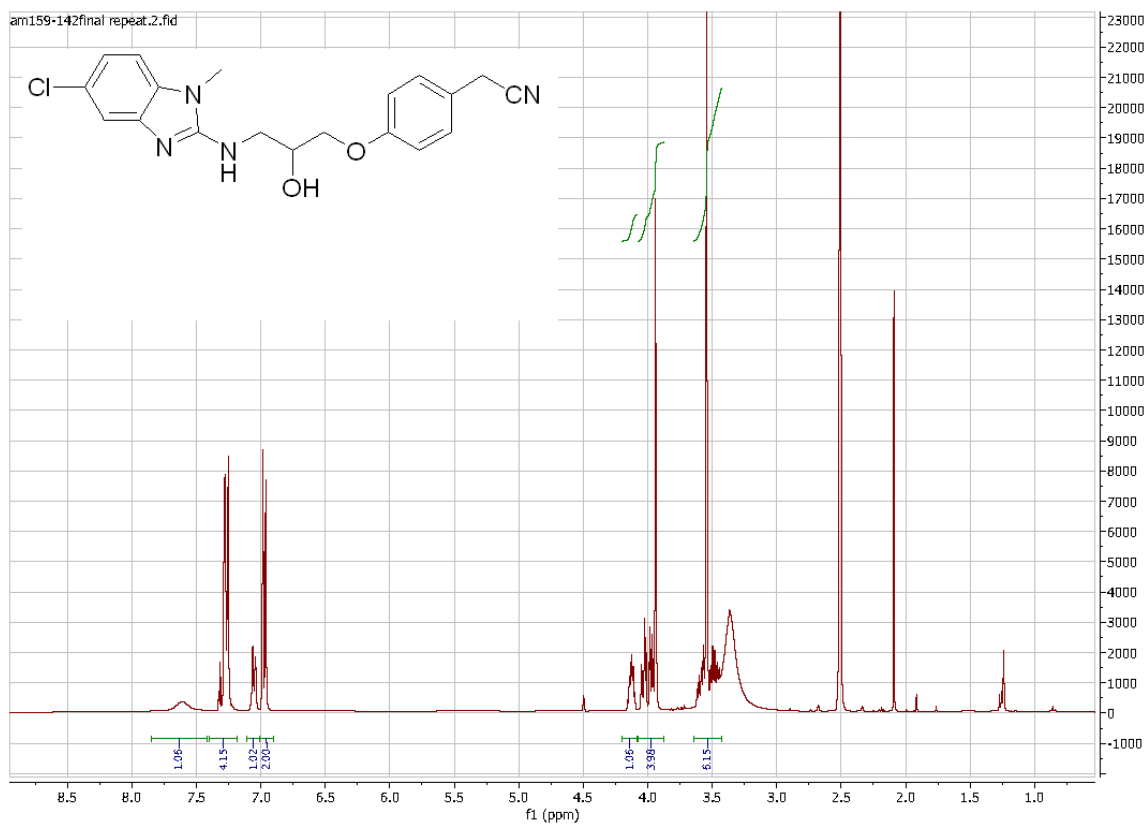

Figure S27. <sup>1</sup>H-NMR spectrum of **6b**.

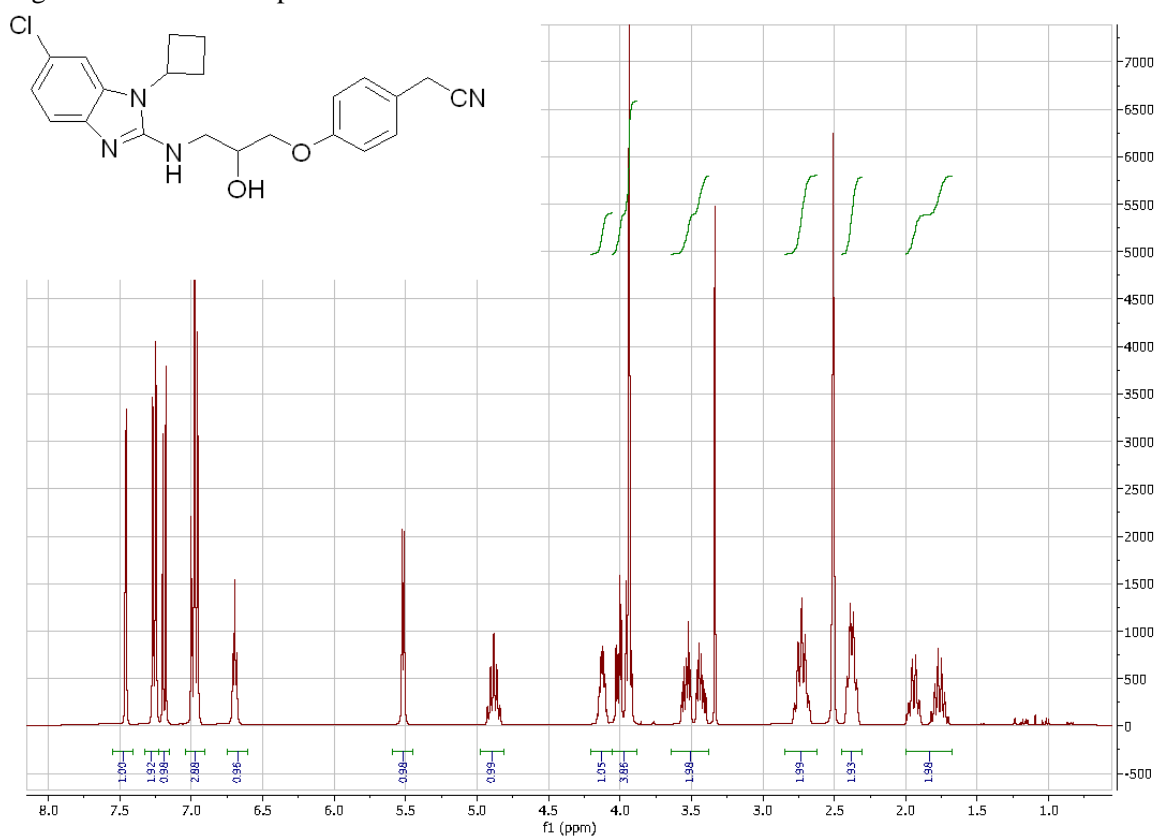

Figure S28. <sup>1</sup>H-NMR spectrum of **6j**

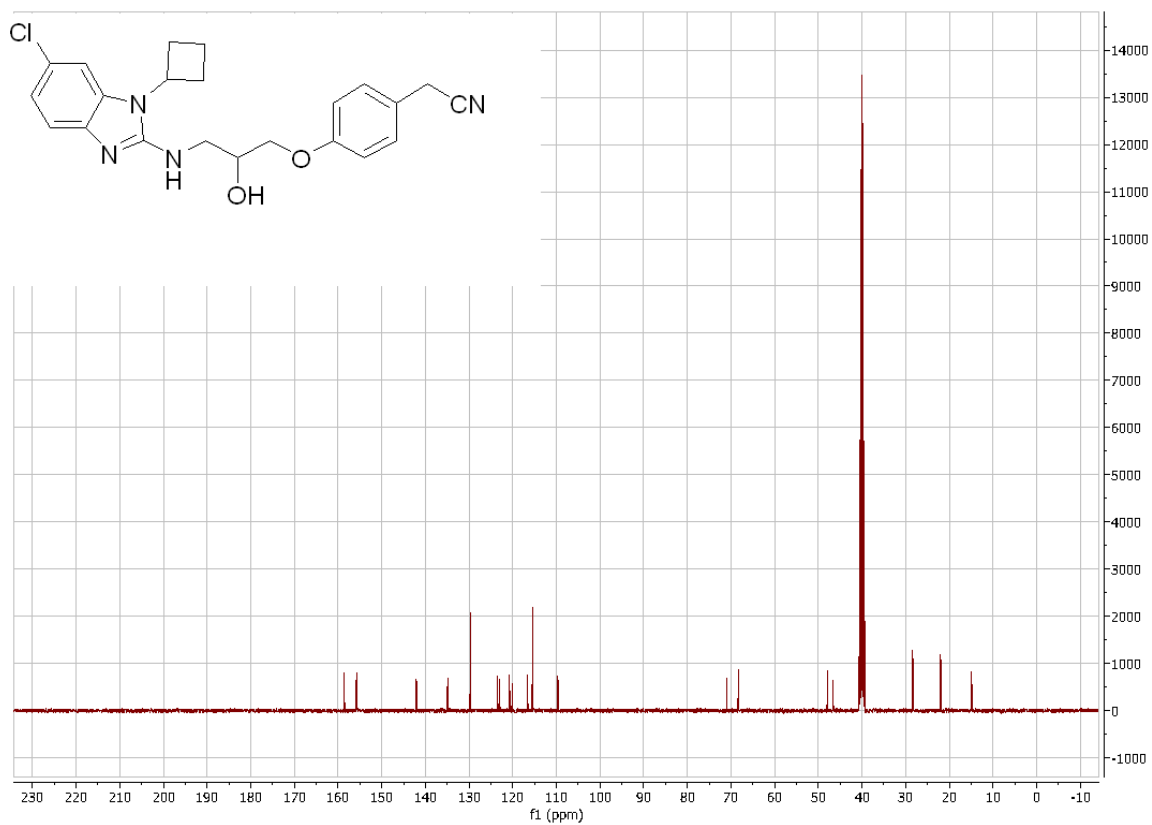

Figure S29.  $^{13}\text{C}$ -NMR spectrum of **6j**.

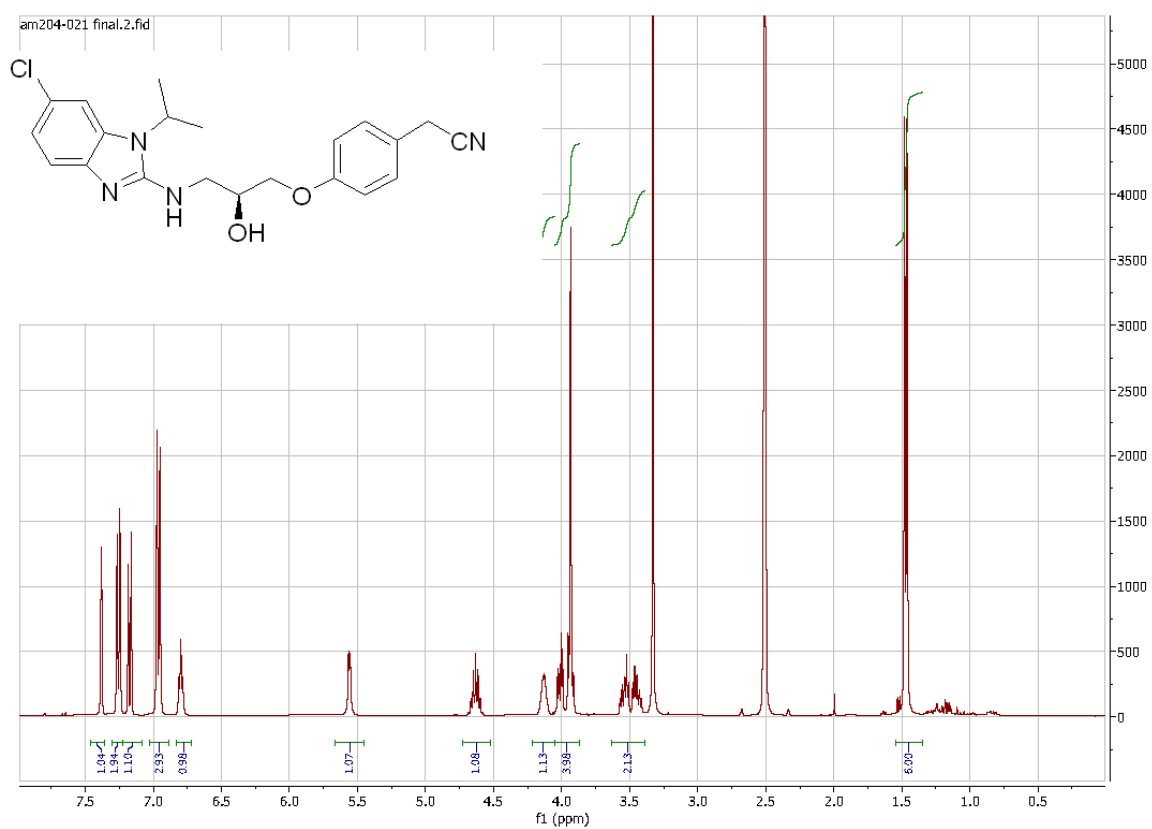

Figure S30.  $^1\text{H}$ -NMR spectrum of **6v**.

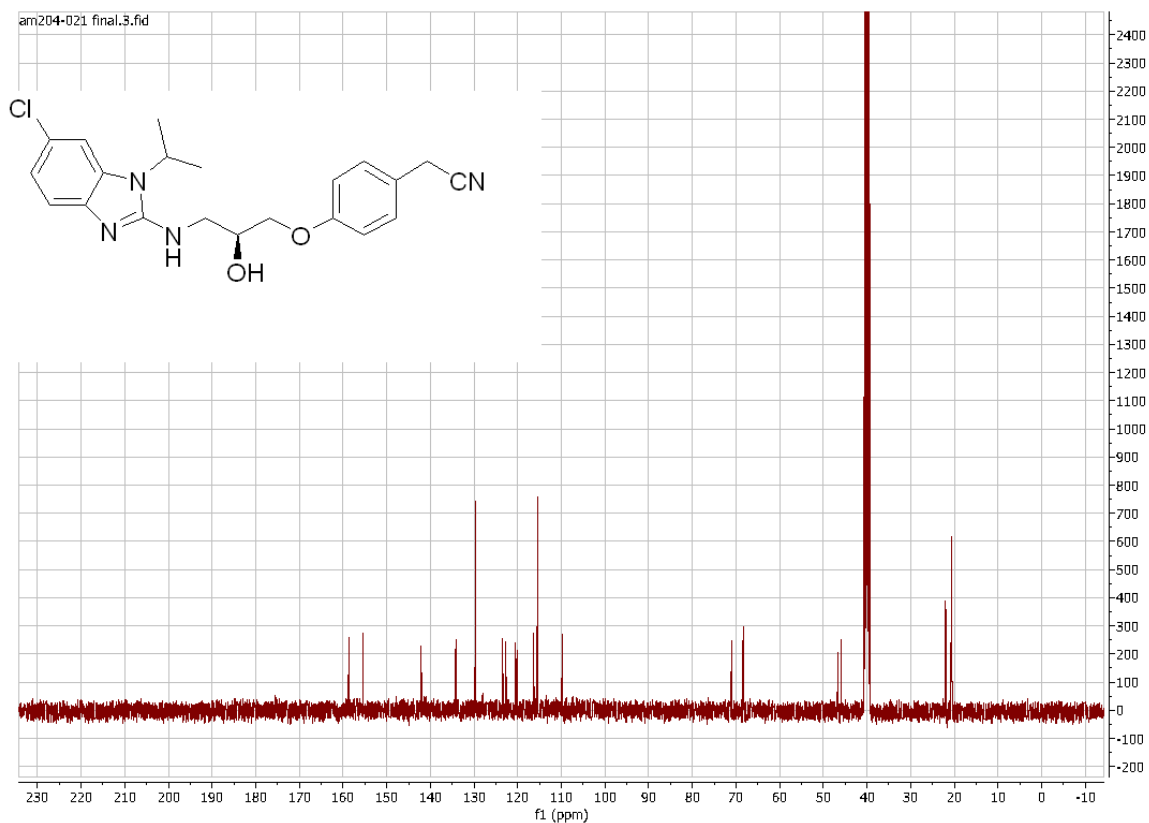

Figure S31.  $^{13}\text{C-NMR}$  spectrum of **6v**.

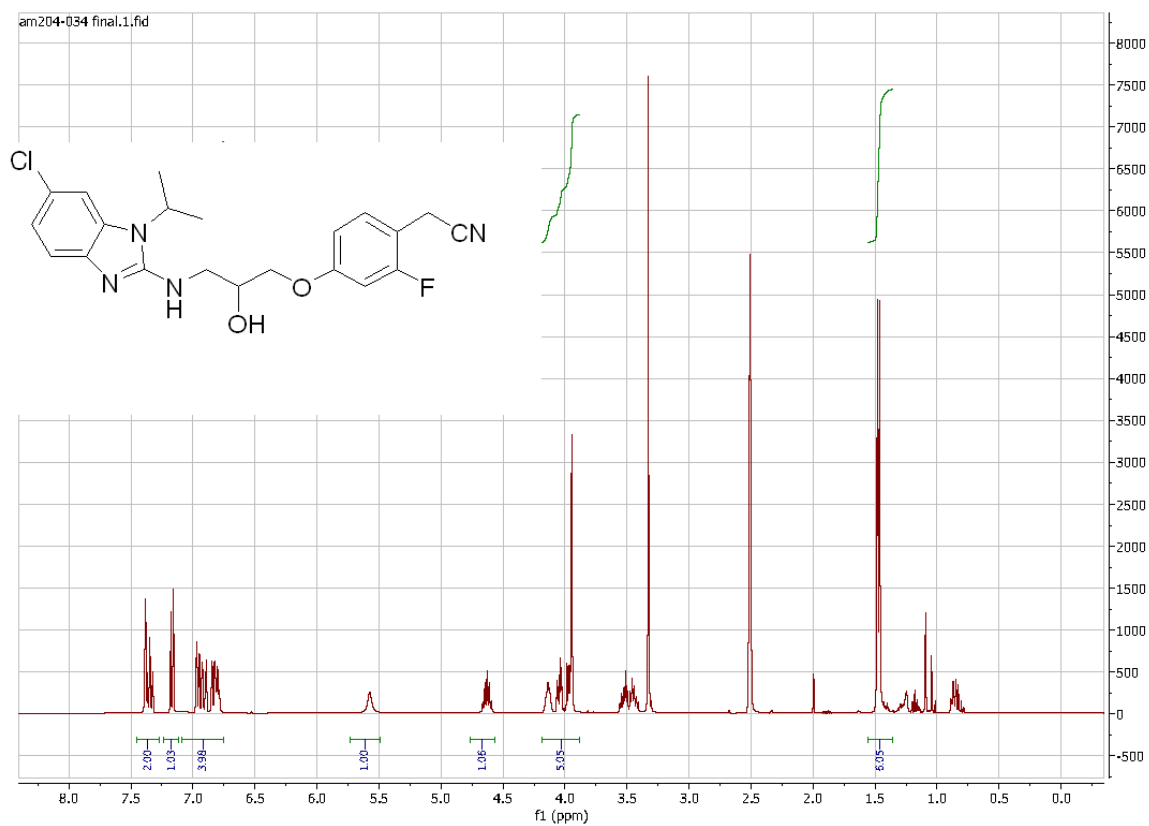

Figure S32.  $^{13}\text{C-NMR}$  spectrum of **6o**.

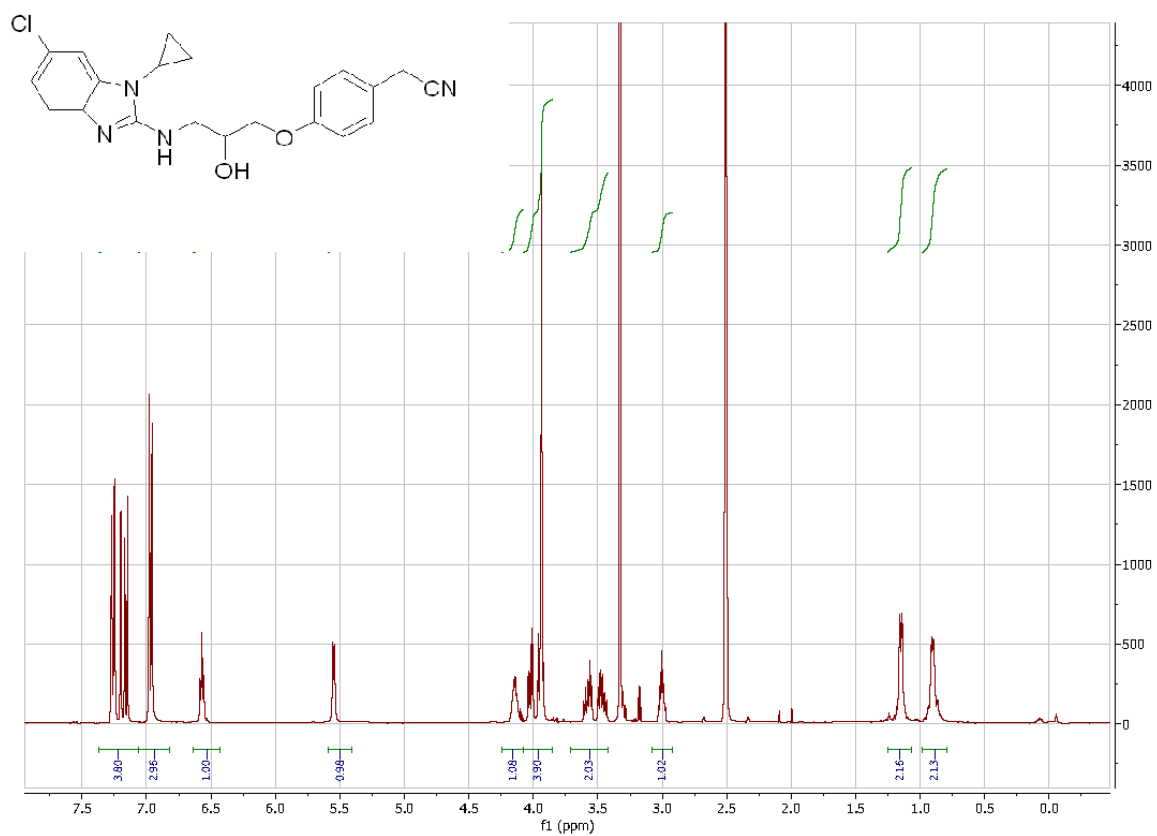

Figure S33. <sup>1</sup>H-NMR spectrum of **6i**.

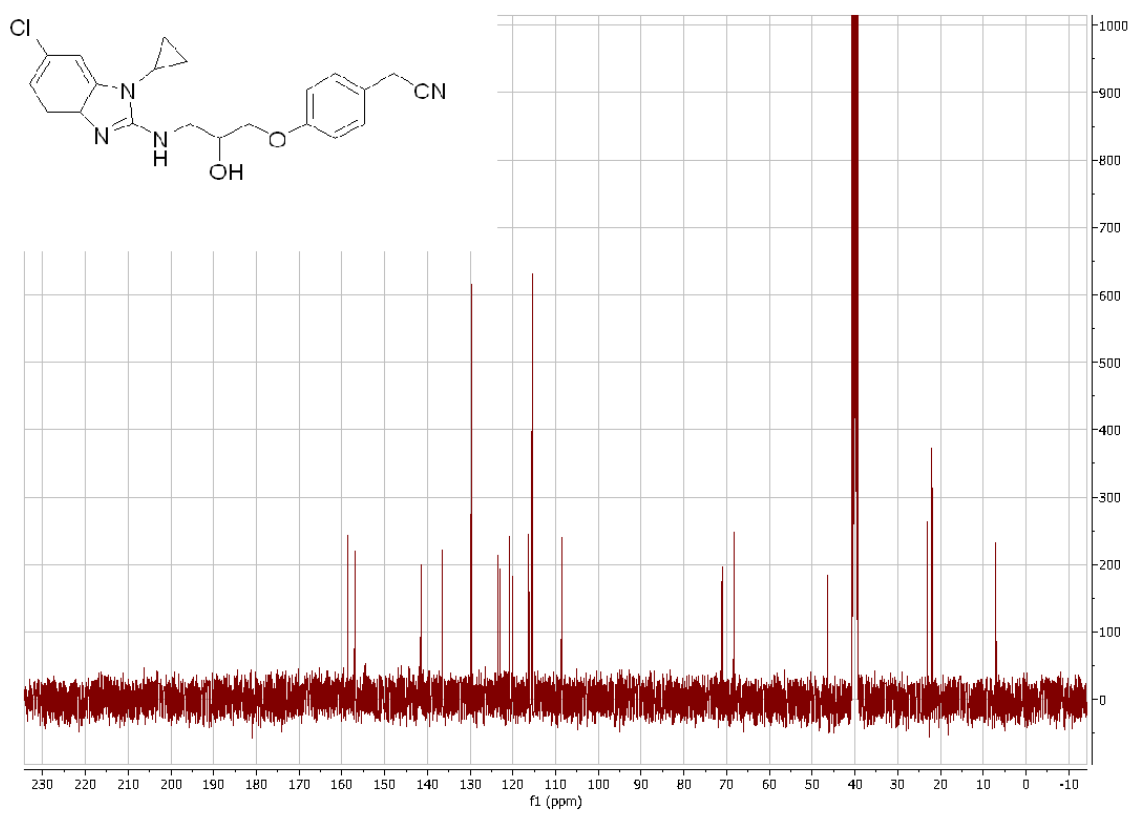

Figure S34. <sup>13</sup>C-NMR spectrum of **6i**.

Printing Time: 13:35:49  
Printing Date: 24 August 2023

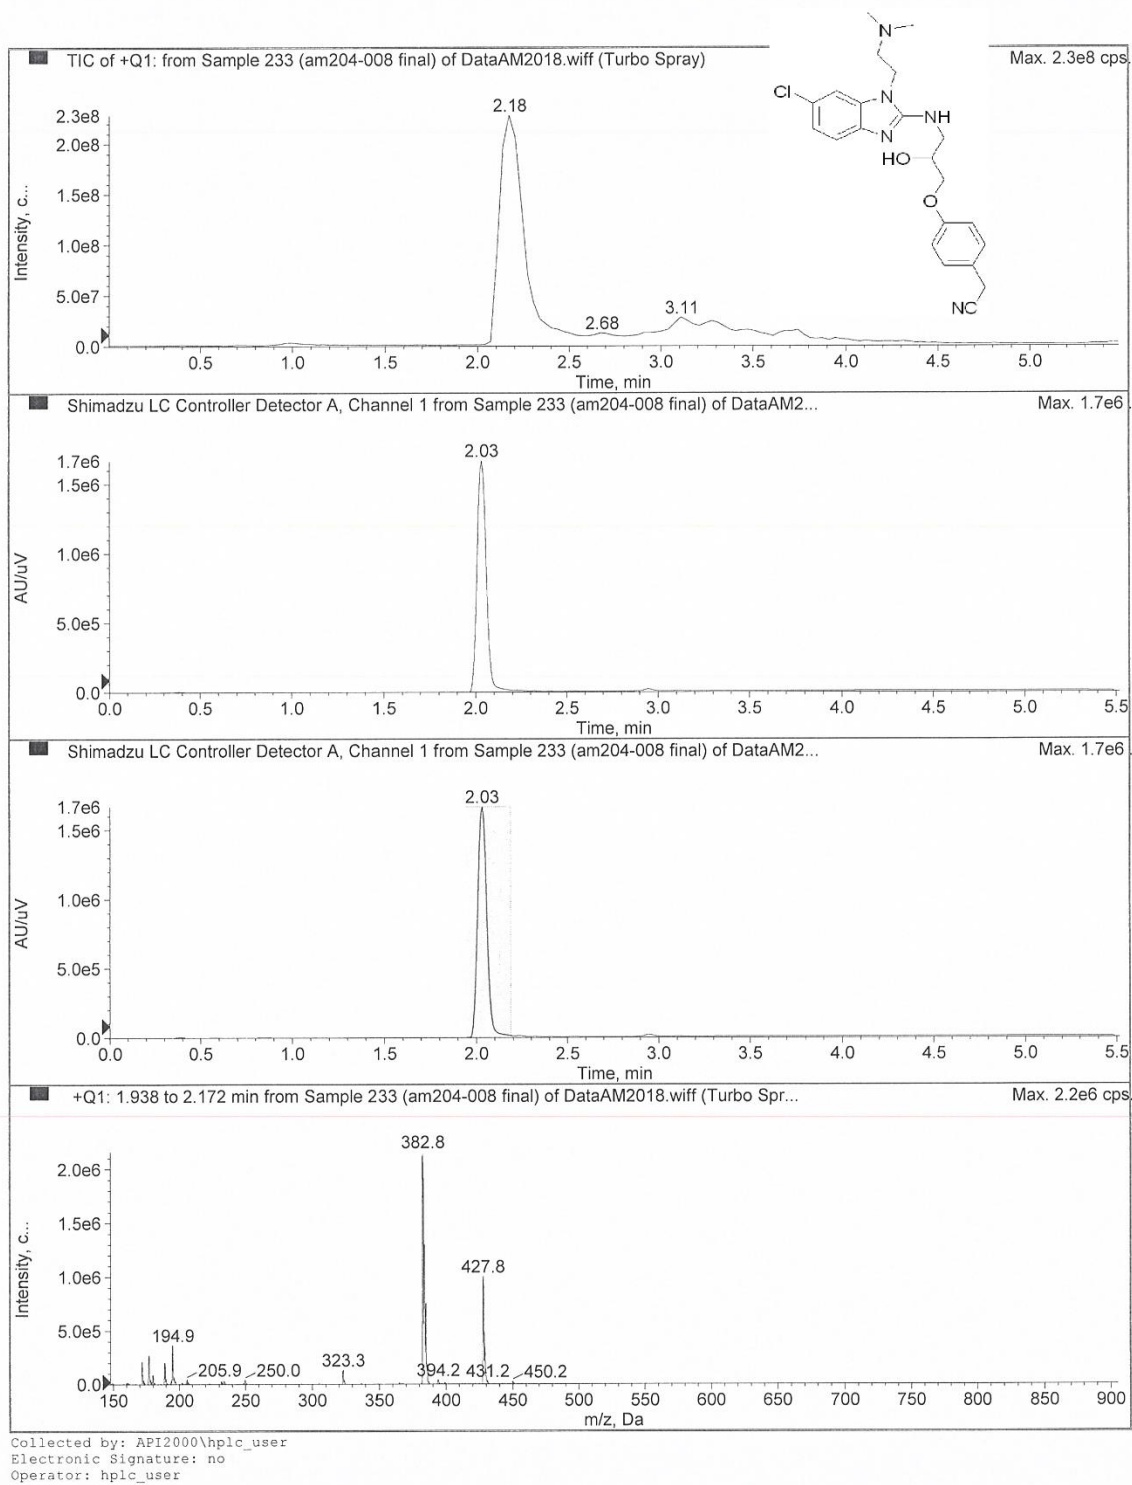

Figure S35. LCMS spectrum of **6q**.

Printing Date: 03 June 2023

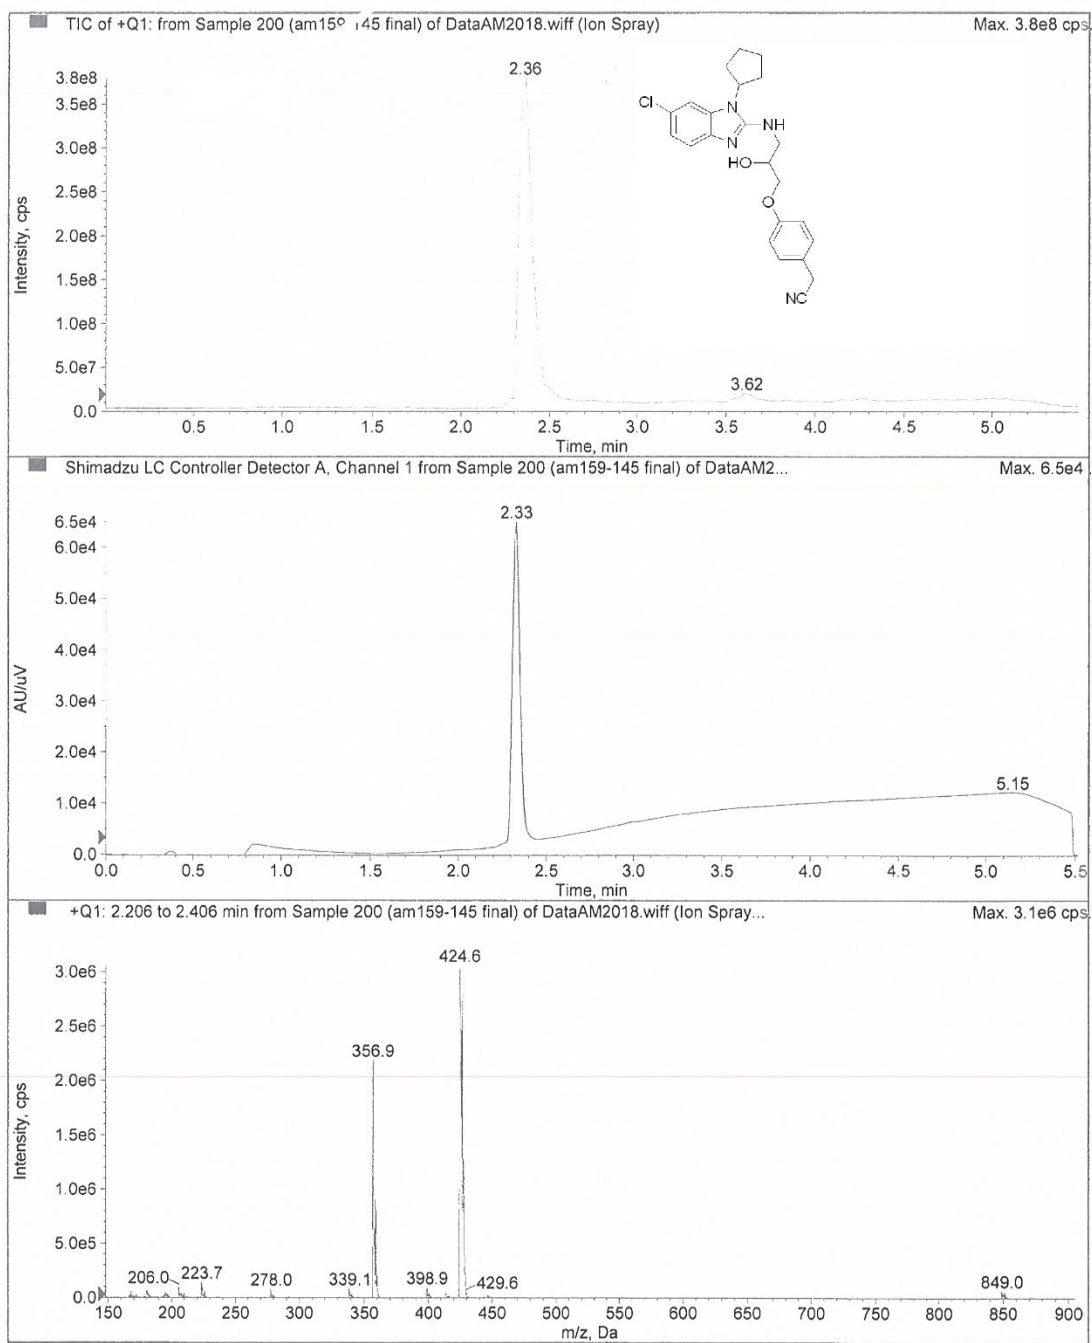

Collected by: API2000\hplc\_user  
Electronic Signature: no  
Operator: hplc\_user

Figure S36. LCMS spectrum of **6k**.

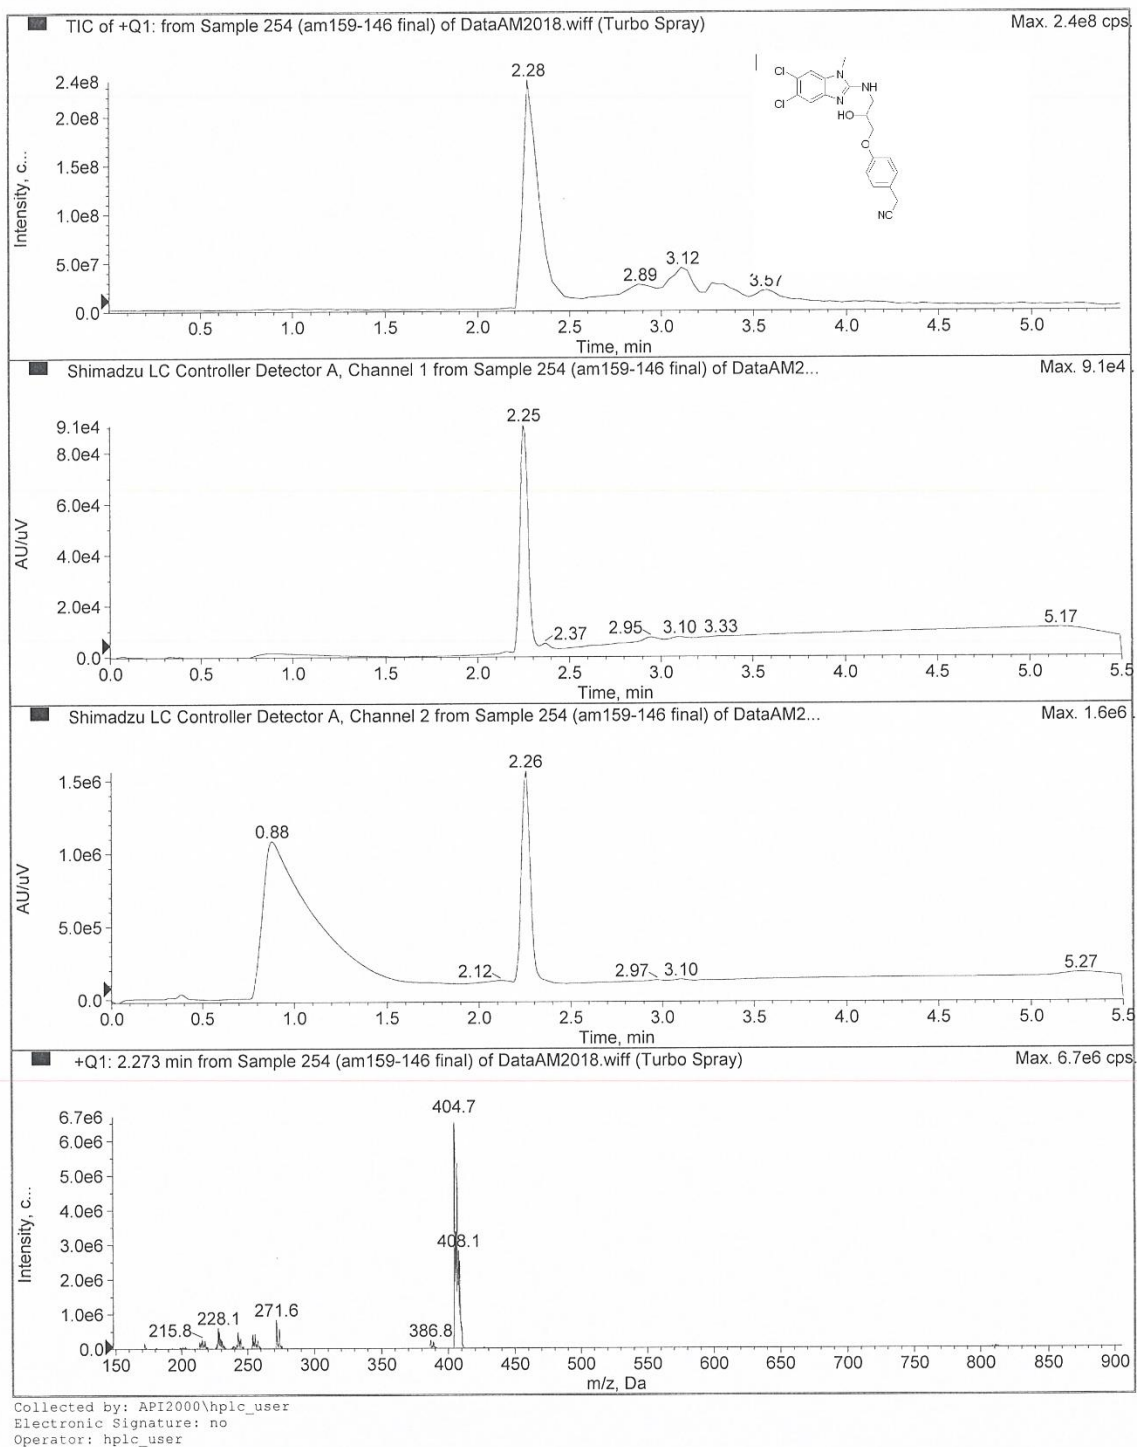

Figure S37. LCMS spectrum of 6c.



Printing Time: 13:29:55  
Printing Date: 24 August 2023

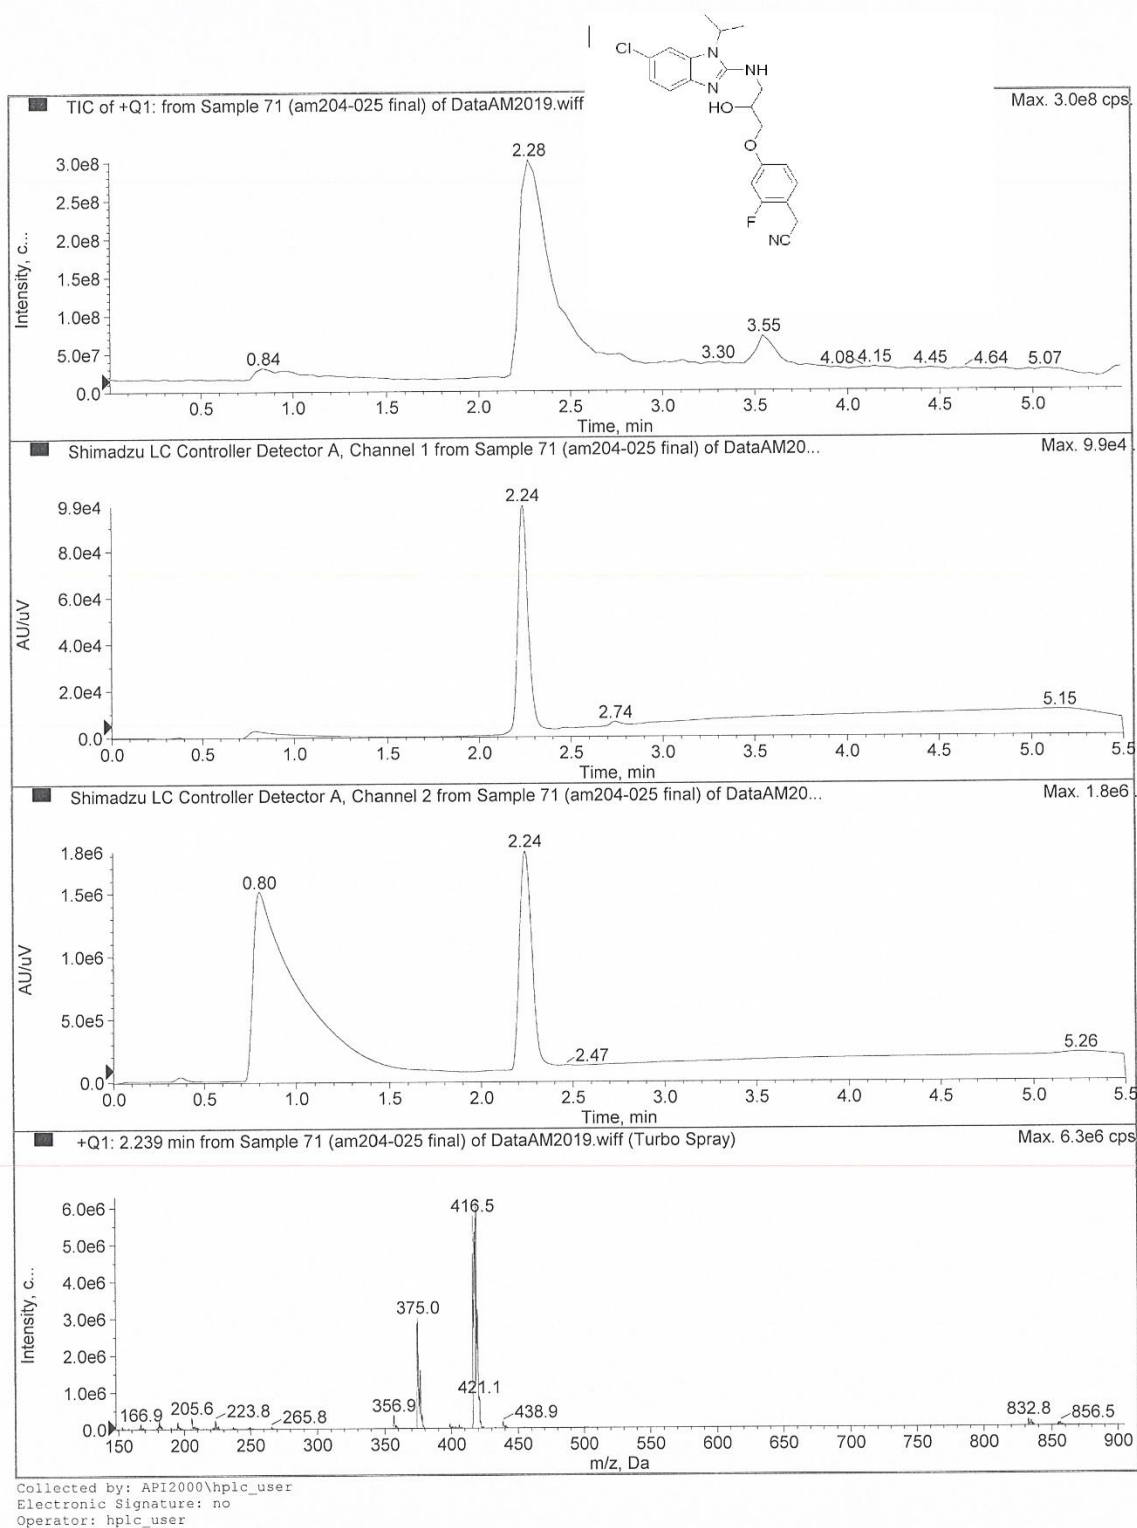

Figure S38. LCMS spectrum of 60.

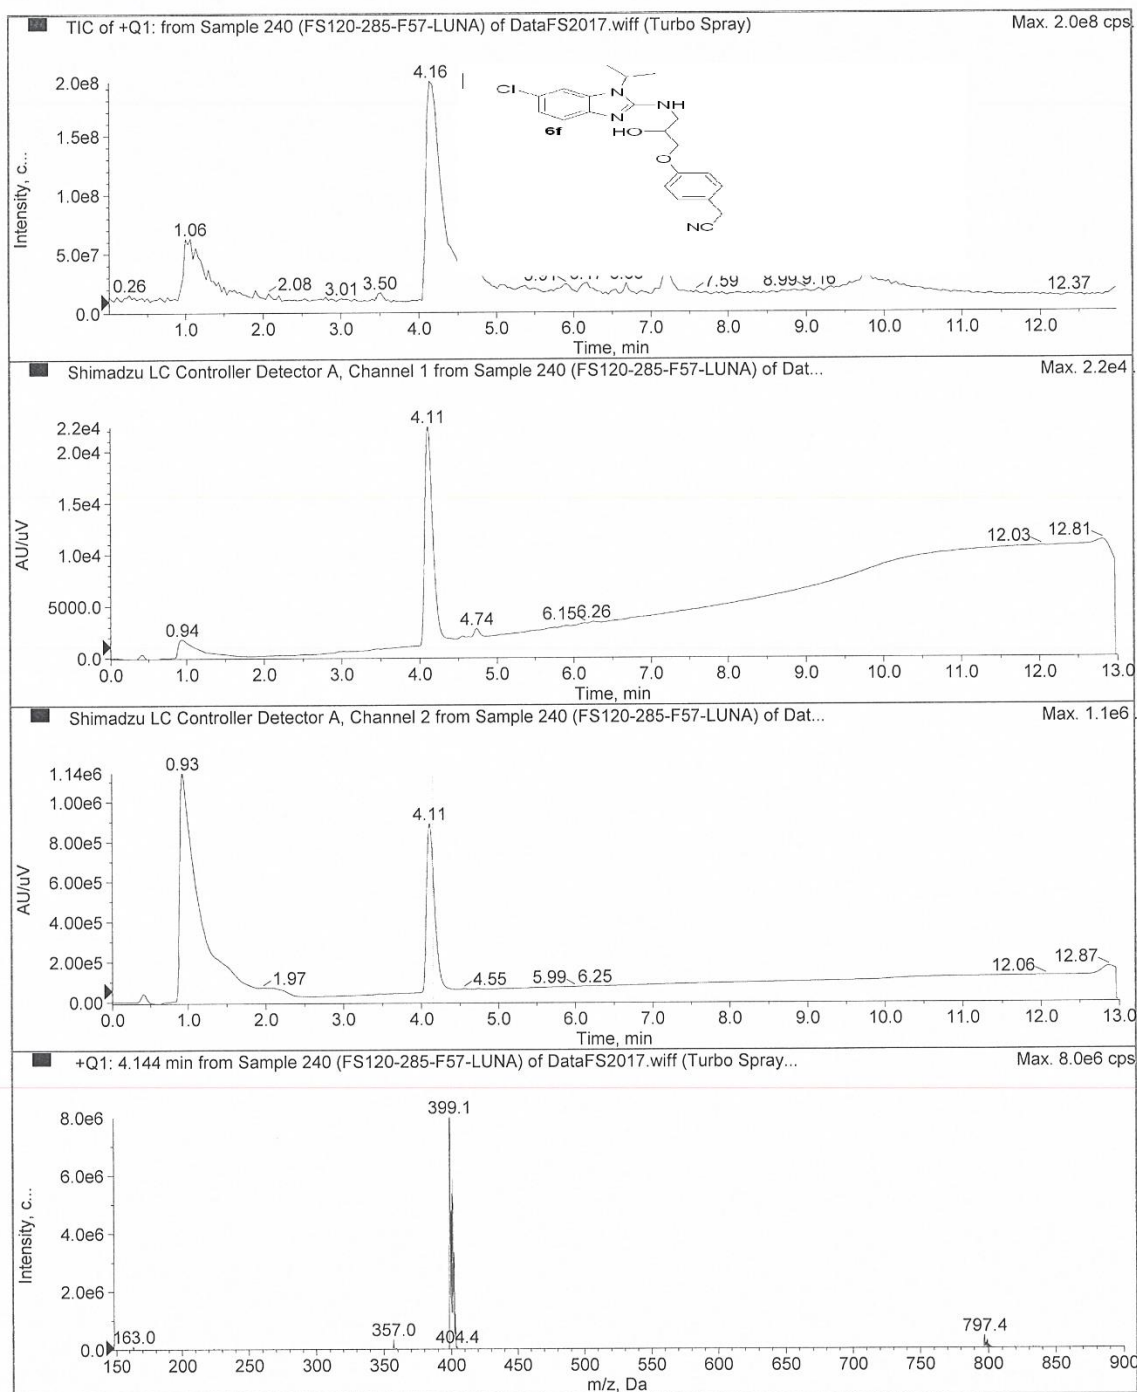

Collected by: API2000\hplc\_user  
Electronic Signature: no  
Operator: hplc\_user

Figure S39. LCMS spectrum of **6f**.

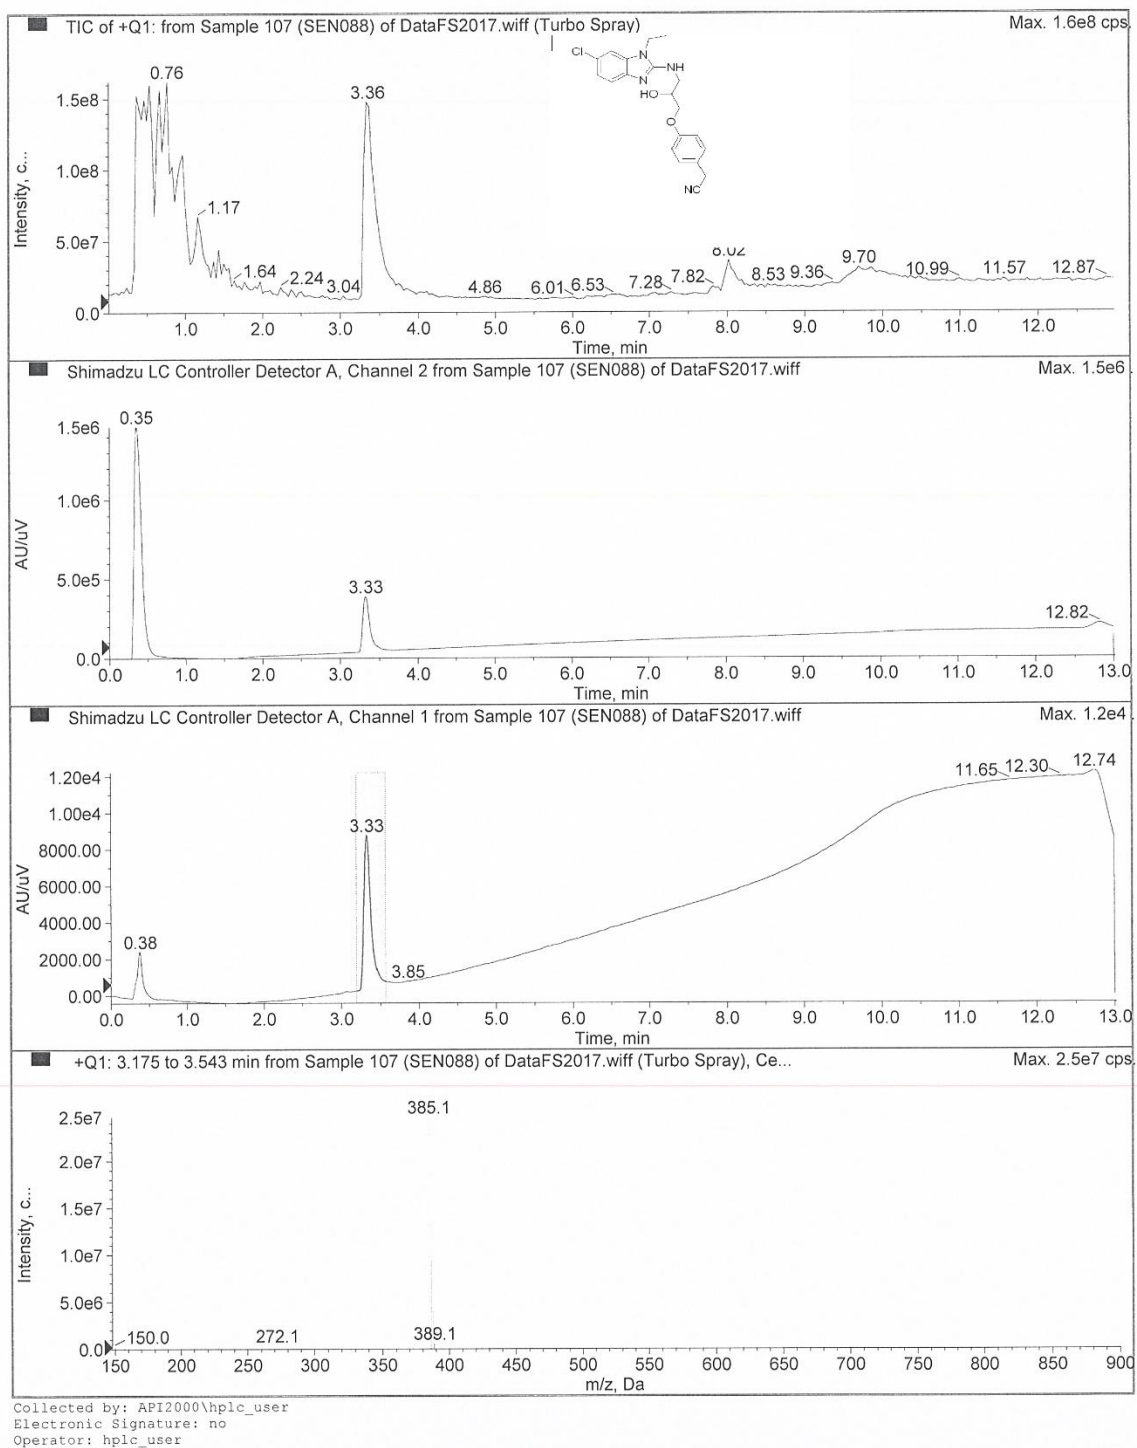

Figure S40. LCMS spectrum of **6e**.

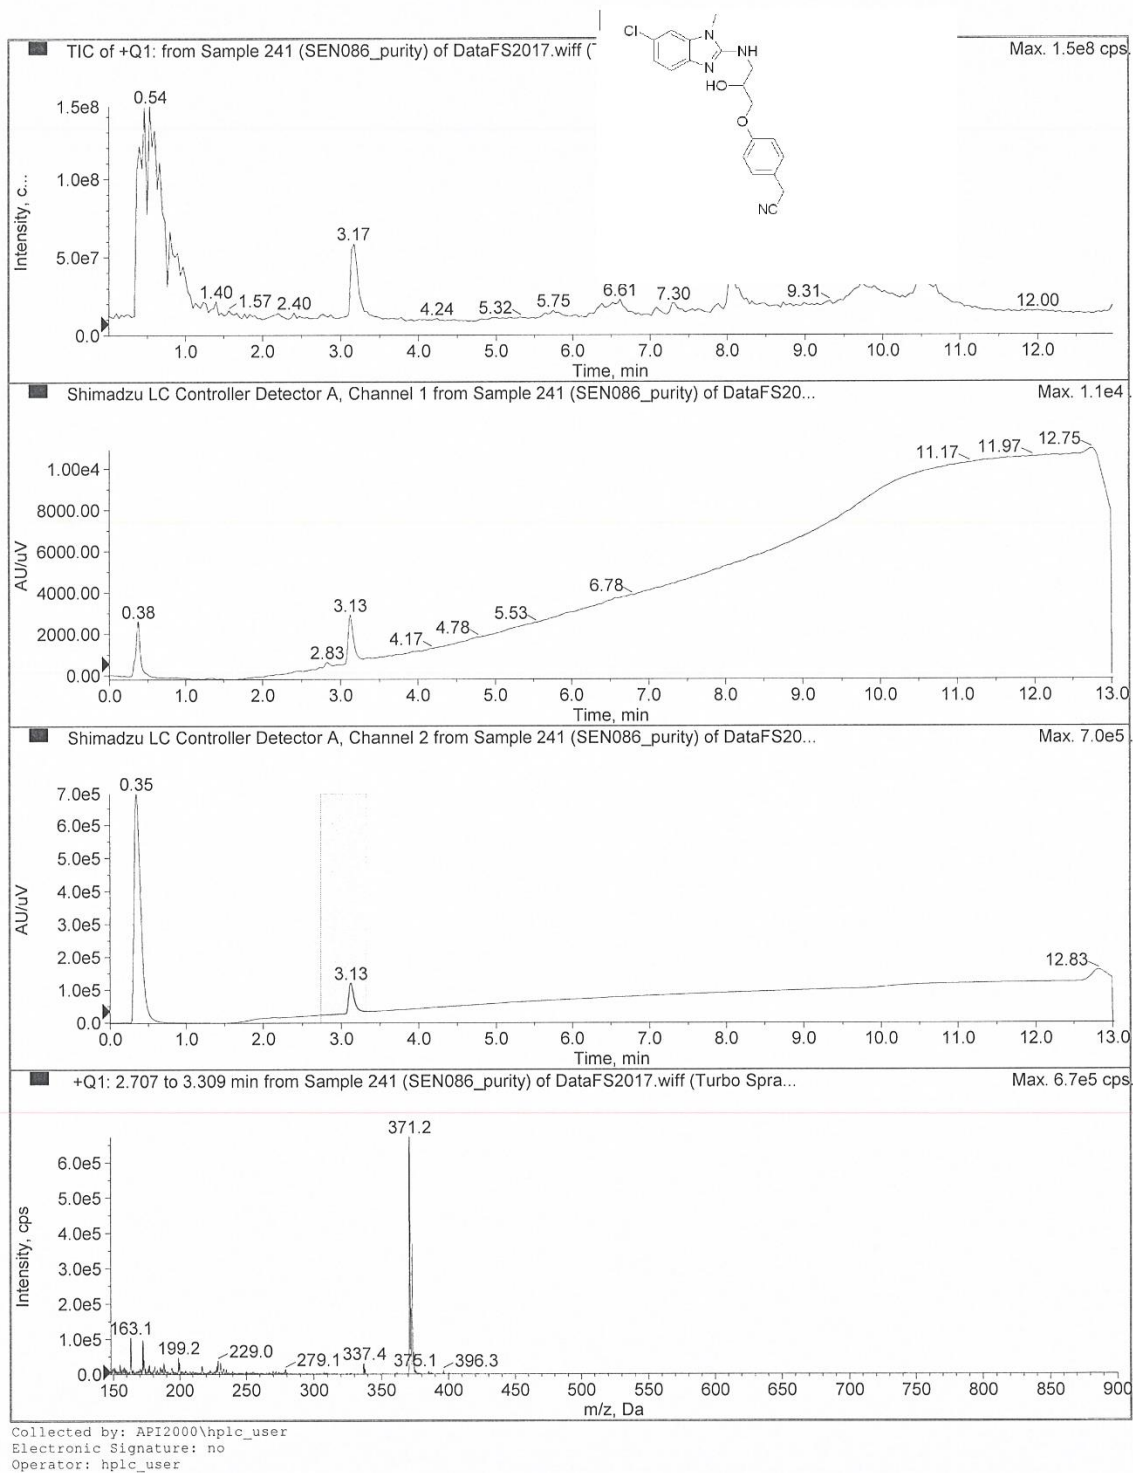

Figure S41. LCMS spectrum of **6a**.

## References

- (1) Soukarieh, F.; Vico Oton, E.; Dubern, J. F.; Gomes, J.; Halliday, N.; de Pilar Crespo, M.; Ramirez-Prada, J.; Insuasty, B.; Abonia, R.; Quiroga, J.; et al. In Silico and in Vitro-Guided Identification of Inhibitors of Alkylquinolone-Dependent Quorum Sensing in *Pseudomonas aeruginosa*. *Molecules* **2018**, *23* (2). DOI: 10.3390/molecules23020257.
- (2) Dubern, J.-F.; Romero, M.; Mai-Prochnow, A.; Messina, M.; Trampari, E.; Gijzel, H. N.-V.; Chan, K.-G.; Carabelli, A. M.; Barraud, N.; Lazenby, J.; et al. ToxR is a c-di-GMP binding protein that modulates surface-associated behaviour in *Pseudomonas aeruginosa*. *npj Biofilms and Microbiomes* **2022**, *8* (1). DOI: 10.1038/s41522-022-00325-9.
- (3) Rahme, L. G.; Stevens, E. J.; Wolfort, S. F.; Shao, J.; Tompkins, R. G.; Ausubel, F. M. Common virulence factors for bacterial pathogenicity in plants and animals. *Science* **1995**, *268* (5219), 1899-1902. DOI: 10.1126/science.7604262.
- (4) Lee, D. G.; Urbach, J. M.; Wu, G.; Liberati, N. T.; Feinbaum, R. L.; Miyata, S.; Diggins, L. T.; He, J.; Saucier, M.; Déziel, E.; et al. Genomic analysis reveals that *Pseudomonas aeruginosa* virulence is combinatorial. *Genome Biol* **2006**, *7* (10), R90. DOI: 10.1186/gb-2006-7-10-r90.
- (5) Winstanley, C.; Langille, M. G. I.; Fothergill, J. L.; Kukavica-Ibrulj, I.; Paradis-Bleau, C.; Sanschagrin, F.; Thomson, N. R.; Winsor, G. L.; Quail, M. A.; Lennard, N.; et al. Newly introduced genomic prophage islands are critical determinants of in vivo competitiveness in the Liverpool Epidemic Strain of *Pseudomonas aeruginosa*. *Genome Res* **2009**, *19* (1), 12-23. DOI: 10.1101/gr.086082.108.
- (6) Freschi, L.; Jeukens, J.; Kukavica-Ibrulj, I.; Boyle, B.; Dupont, M. J.; Laroche, J.; Larose, S.; Maaroufi, H.; Fothergill, J. L.; Moore, M.; et al. Clinical utilization of genomics data produced by the international *Pseudomonas aeruginosa* consortium. *Front Microbiol* **2015**, *6*, 1036. DOI: 10.3389/fmicb.2015.01036.
- (7) Freschi, L.; Vincent, A. T.; Jeukens, J.; Emond-Rheault, J. G.; Kukavica-Ibrulj, I.; Dupont, M. J.; Charette, S. J.; Boyle, B.; Levesque, R. C. The *Pseudomonas aeruginosa* Pan-Genome Provides New Insights on Its Population Structure, Horizontal Gene Transfer, and Pathogenicity. *Genome Biol Evol* **2019**, *11* (1), 109-120. DOI: 10.1093/gbe/evy259.
- (8) Roy, P. H.; Tetu, S. G.; Larouche, A.; Elbourne, L.; Tremblay, S.; Ren, Q.; Dodson, R.; Harkins, D.; Shay, R.; Watkins, K.; et al. Complete genome sequence of the multiresistant taxonomic outlier *Pseudomonas aeruginosa* PA7. *PLoS One* **2010**, *5* (1), e8842. DOI: 10.1371/journal.pone.0008842.
- (9) Diggle, S. P.; Matthijs, S.; Wright, V. J.; Fletcher, M. P.; Chhabra, S. R.; Lamont, I. L.; Kong, X.; Hider, R. C.; Cornelis, P.; Cámara, M.; et al. The *Pseudomonas aeruginosa* 4-quinolone signal molecules HHQ and PQS play multifunctional roles in quorum sensing and iron entrapment. *Chem Biol* **2007**, *14* (1), 87-96. DOI: 10.1016/j.chembiol.2006.11.014.
- (10) Popat, R.; Crusz, S. A.; Messina, M.; Williams, P.; West, S. A.; Diggle, S. P. Quorum-sensing and cheating in bacterial biofilms. *Proc Biol Sci* **2012**, *279* (1748), 4765-4771. DOI: 10.1098/rspb.2012.1976.
